# Supplementary material for: Gene loss, adaptive evolution and the co-evolution of plumage coloration genes with opsins in birds
Source: PubMed Central journal article supplement (PMC4595237; doi:10.1186/s12864-015-1924-3), 2015-10-06

$\frac{\%CG}{\%C\%G}$

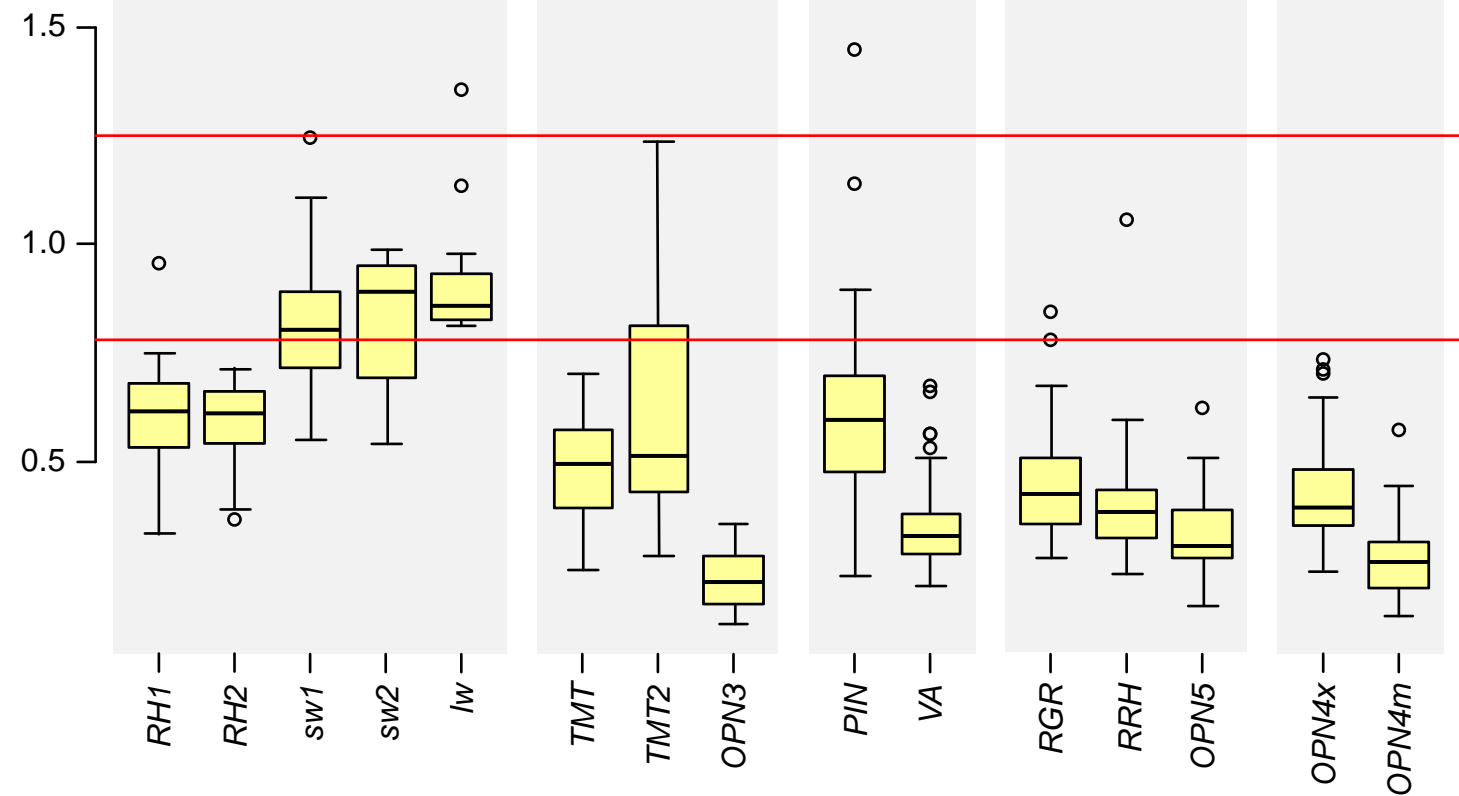

Supplement: 12864_2015_1924_MOESM1_ESM.pdf [file 12864_2015_1924_MOESM1_ESM.pdf]
