# Supplementary material for: Gene loss, adaptive evolution and the co-evolution of plumage coloration genes with opsins in birds
Source: PubMed Central journal article supplement (PMC4595237; doi:10.1186/s12864-015-1924-3), 2015-10-06
Supplement: 12864_2015_1924_MOESM2_ESM.pdf [file 12864_2015_1924_MOESM2_ESM.pdf]

|              | <i>lw</i> | <i>OPN3</i> | <i>OPN4m</i> | <i>OPN4x</i> | <i>OPN5</i> | <i>PIN</i> | <i>RGR</i> | <i>RH1</i> | <i>RH2</i> | <i>RRH</i> | <i>sw1</i> | <i>sw2</i> | <i>TMT</i> | <i>TMT2</i> |
|--------------|-----------|-------------|--------------|--------------|-------------|------------|------------|------------|------------|------------|------------|------------|------------|-------------|
| <i>OPN3</i>  | 0.000     | .           |              |              |             |            |            |            |            |            |            |            |            |             |
| <i>OPN4m</i> | 0.000     | 0.081       | .            |              |             |            |            |            |            |            |            |            |            |             |
| <i>OPN4x</i> | 0.000     | 0.000       | 0.000        | .            |             |            |            |            |            |            |            |            |            |             |
| <i>OPN5</i>  | 0.000     | 0.000       | 0.002        | 0.000        | .           |            |            |            |            |            |            |            |            |             |
| <i>PIN</i>   | 0.000     | 0.000       | 0.000        | 0.000        | 0.000       | .          |            |            |            |            |            |            |            |             |
| <i>RGR</i>   | 0.000     | 0.000       | 0.000        | 1.000        | 0.000       | 0.000      | .          |            |            |            |            |            |            |             |
| <i>RH1</i>   | 0.000     | 0.000       | 0.000        | 0.000        | 0.000       | 1.000      | 0.000      | .          |            |            |            |            |            |             |
| <i>RH2</i>   | 0.000     | 0.000       | 0.000        | 0.000        | 0.000       | 1.000      | 0.000      | 1.000      | .          |            |            |            |            |             |
| <i>RRH</i>   | 0.000     | 0.000       | 0.000        | 1.000        | 0.112       | 0.000      | 0.278      | 0.000      | 0.000      | .          |            |            |            |             |
| <i>sw1</i>   | 1.000     | 0.000       | 0.000        | 0.000        | 0.000       | 0.000      | 0.000      | 0.000      | 0.000      | 0.000      | .          |            |            |             |
| <i>sw2</i>   | 1.000     | 0.000       | 0.000        | 0.000        | 0.000       | 0.003      | 0.000      | 0.006      | 0.002      | 0.000      | 1.000      | .          |            |             |
| <i>TMT</i>   | 0.000     | 0.000       | 0.000        | 1.000        | 0.000       | 0.195      | 1.000      | 0.108      | 0.195      | 0.108      | 0.000      | 0.000      | .          |             |
| <i>TMT2</i>  | 0.000     | 0.000       | 0.000        | 0.000        | 0.000       | 1.000      | 0.000      | 1.000      | 1.000      | 0.000      | 0.000      | 0.002      | 0.173      | .           |
| <i>VA</i>    | 0.000     | 0.000       | 0.000        | 0.026        | 1.000       | 0.000      | 0.002      | 0.000      | 0.000      | 1.000      | 0.000      | 0.000      | 0.002      | 0.000       |
