# Supplementary material for: Gene loss, adaptive evolution and the co-evolution of plumage coloration genes with opsins in birds
Source: PubMed Central journal article supplement (PMC4595237; doi:10.1186/s12864-015-1924-3), 2015-10-06
Supplement: 12864_2015_1924_MOESM3_ESM.pdf [file 12864_2015_1924_MOESM3_ESM.pdf]

### A. Site-selection for avian opsins

| Gene           | lnL M7     | np | lnL M8     | np | LRT 7-8 | p-value | lnL M8a    | np | LRT 8a-8 | p-value | $\omega$ |    |
|----------------|------------|----|------------|----|---------|---------|------------|----|----------|---------|----------|----|
| <i>RH1</i>     | -7281.893  | 95 | -7259.274  | 97 | 45.238  | 0.000   | -7269.845  | 96 | 21.142   | 0.000   | 0.061    | ** |
| <i>RH2</i>     | -8492.132  | 93 | -8473.652  | 95 | 36.959  | 0.000   | -8474.673  | 94 | 2.041    | 0.153   | 0.080    |    |
| <i>OPN1sw1</i> | -5772.490  | 65 | -5769.586  | 67 | 5.808   | 0.055   | -5769.697  | 66 | 0.223    | 0.637   | 0.041    | *  |
| <i>OPN1sw2</i> | -3695.364  | 27 | -3695.367  | 29 | 0.000   | 1.000   | -3695.594  | 28 | 0.453    | 0.501   | 0.050    | *  |
| <i>OPN1lw</i>  | -2472.949  | 33 | -2472.952  | 35 | 0.000   | 1.000   | -2472.648  | 34 | 0.000    | 1.000   | 0.024    | *  |
| <i>TMT</i>     | -2850.553  | 35 | -2850.394  | 37 | 0.320   | 0.852   | -2850.392  | 36 | 0.000    | 1.000   | 0.220    | *  |
| <i>TMT2</i>    | -4682.709  | 97 | -4678.257  | 99 | 8.904   | 0.012   | -4678.322  | 98 | 0.130    | 0.719   | 0.118    |    |
| <i>OPN3</i>    | -3619.953  | 89 | -3617.762  | 91 | 4.381   | 0.112   | -3617.821  | 90 | 0.119    | 0.730   | 0.101    | *  |
| <i>PIN</i>     | -12231.617 | 81 | -12191.501 | 83 | 80.231  | 0.000   | -12202.455 | 82 | 21.908   | 0.000   | 0.230    | ** |
| <i>VA</i>      | -8654.677  | 91 | -8634.321  | 93 | 40.713  | 0.000   | -8641.777  | 92 | 14.912   | 0.000   | 0.265    | ** |
| <i>RGR</i>     | -7439.267  | 97 | -7421.642  | 99 | 35.251  | 0.000   | -7434.286  | 98 | 25.288   | 0.000   | 0.148    | ** |
| <i>RRH</i>     | -6693.016  | 97 | -6673.678  | 99 | 38.677  | 0.000   | -6680.310  | 98 | 13.264   | 0.000   | 0.155    | ** |
| <i>OPN5</i>    | -8232.778  | 93 | -8225.471  | 95 | 14.616  | 0.001   | -8226.468  | 94 | 1.995    | 0.158   | 0.112    |    |
| <i>OPN4x</i>   | -11033.939 | 97 | -11012.902 | 99 | 42.074  | 0.000   | -11022.799 | 98 | 19.794   | 0.000   | 0.171    | ** |
| <i>OPN4m</i>   | -7206.853  | 93 | -7200.398  | 95 | 12.911  | 0.002   | -7201.795  | 94 | 2.796    | 0.095   | 0.203    |    |

### B. Site-selection for avian melanin-based plumage coloration genes

| Gene         | lnL M7     | np | lnL M8     | np | LRT 7-8 | p-value | lnL M8a    | np | LRT 8a-8 | p-value | $\omega$ |    |
|--------------|------------|----|------------|----|---------|---------|------------|----|----------|---------|----------|----|
| <i>MC1R</i>  | -4933.893  | 45 | -4932.207  | 47 | 3.371   | 0.185   | -4931.955  | 46 | 0.000    | 1.000   | 0.065    | *  |
| <i>TYR</i>   | -14405.107 | 97 | -14378.035 | 99 | 54.143  | 0.000   | -14384.898 | 98 | 13.725   | 0.000   | 0.209    | ** |
| <i>TYRP1</i> | -9591.835  | 83 | -9578.852  | 85 | 25.966  | 0.000   | -9579.190  | 84 | 0.677    | 0.411   | 0.078    |    |
| <i>OCA2</i>  | -15119.542 | 79 | -15094.068 | 81 | 50.947  | 0.000   | -15110.967 | 80 | 33.797   | 0.000   | 0.196    | ** |
| <i>ASIP</i>  | -5477.254  | 83 | -5447.139  | 85 | 60.231  | 0.000   | -5459.776  | 84 | 25.275   | 0.000   | 0.429    | ** |

### C. Site-selection for mammalian opsins

| Gene           | lnL M7     | np  | lnL M8     | np  | LRT 7-8 | <i>p</i> -value | lnL M8a    | np  | LRT 8a-8 | <i>p</i> -value | $\omega$ |    |
|----------------|------------|-----|------------|-----|---------|-----------------|------------|-----|----------|-----------------|----------|----|
| <i>RHI</i>     | -18060.196 | 251 | -18060.200 | 253 | 0.000   | 1.000           | -18056.699 | 252 | 0.000    | 1.000           | 0.064    | *  |
| <i>OPN1sw1</i> | -17626.250 | 199 | -17605.265 | 201 | 41.971  | 0.000           | -17607.898 | 200 | 5.266    | 0.022           | 0.178    | ** |
| <i>OPN1lw</i>  | -20776.122 | 253 | -20769.910 | 255 | 12.424  | 0.002           | -20766.851 | 254 | 0.000    | 1.000           | 0.135    |    |
| <i>OPN3</i>    | -14209.085 | 127 | -14171.960 | 129 | 74.251  | 0.000           | -14185.161 | 128 | 26.402   | 0.000           | 0.310    | ** |
| <i>RGR</i>     | -15640.311 | 155 | -15634.514 | 157 | 11.596  | 0.003           | -15633.702 | 156 | 0.000    | 1.000           | 0.193    |    |
| <i>RRH</i>     | -16299.456 | 165 | -16286.261 | 167 | 26.391  | 0.000           | -16295.620 | 166 | 18.717   | 0.000           | 0.273    | ** |
| <i>OPN5</i>    | -11367.748 | 163 | -11360.527 | 165 | 14.441  | 0.001           | -11361.359 | 164 | 1.664    | 0.197           | 0.089    |    |
| <i>OPN4m</i>   | -26002.747 | 169 | -25972.711 | 171 | 60.072  | 0.000           | -25981.877 | 170 | 18.333   | 0.000           | 0.239    | ** |
