# Supplementary material for: Gene loss, adaptive evolution and the co-evolution of plumage coloration genes with opsins in birds
Source: PubMed Central journal article supplement (PMC4595237; doi:10.1186/s12864-015-1924-3), 2015-10-06
Supplement: 12864_2015_1924_MOESM5_ESM.pdf [file 12864_2015_1924_MOESM5_ESM.pdf]

| Species                         | RH1   | RH2   | sw1   | OPN4m | OPN4x | OPN3  | TMT   | TMT2  | PIN   | VA    | RGR   | RRH   | OPN5  | MCIR  | TYR   | TYRPI | OCA2  | ASIP  |
|---------------------------------|-------|-------|-------|-------|-------|-------|-------|-------|-------|-------|-------|-------|-------|-------|-------|-------|-------|-------|
| <i>Acanthisitta chloris</i>     | 0.076 | 0.031 |       | 0.219 | 0.163 | 0.026 |       | 0.133 |       | 0.684 | 0.235 | 0.169 | 0.128 | 0.067 | 0.216 | 0.06  | 0.097 |       |
| <i>Anas platyrhynchos</i>       | 0.007 | 0.013 |       | 0.087 | 0.079 | 0.09  |       | 0.04  | 0.074 | 0.125 | 0.068 | 0.099 | 0.082 | 0.026 | 0.156 |       | 0.113 | 0.648 |
| <i>Apaloderma vittatum</i>      | 0.021 | 0.057 |       | 0.109 | 0.104 | 0.053 |       | 0.045 | 0.116 | 0.182 | 0.114 | 0.21  | 0.058 |       | 0.141 | 0.073 |       | 0.35  |
| <i>Aptenodytes forsteri</i>     | 0.087 | 0.092 |       | 0.219 | 0.193 | 0.204 | 0.306 | 0.102 | 0.38  | 0.18  | 0.105 | 0.203 | 0.149 | 0.101 | 0.088 | 0.069 | 0.098 | 0.204 |
| <i>Balearica regulorum</i>      | 0.026 |       |       | 0.171 | 0.078 | 0.082 |       | 0.12  | 0.077 | 0.151 | 0.075 | 0.171 | 0.027 |       | 0.113 |       | 0.141 | 0.368 |
| <i>Buceros rhinoceros</i>       | 0.018 | 0.018 |       | 0.217 | 0.115 | 0.167 |       | 0.105 | 0.068 | 0.302 | 0.089 | 0.172 | 0.044 |       | 0.099 | 0.062 | 0.105 |       |
| <i>Calypte anna</i>             | 0.025 | 0.017 |       | 0.171 | 0.199 | 0.113 |       | 0.1   | 0.109 | 0.265 | 0.134 | 0.158 | 0.082 |       | 0.293 | 0.155 | 0.338 | 0.15  |
| <i>Caprimugus carolinensis</i>  | 0.069 | 0.041 |       | 0.113 | 0.15  | 0.161 | 0.284 | 0.089 | 0.078 | 0.134 | 0.124 | 0.269 | 0.06  |       | 0.175 | 0.088 | 0.132 | 0.125 |
| <i>Cariama cristata</i>         | 0     | 0.015 |       | 0.217 | 0.095 | 0.687 |       | 0.074 | 0.11  | 0.338 | 0.164 | 0.368 | 0.029 |       | 0.085 | 0.063 | 0.135 | 0.38  |
| <i>Cathartes aura</i>           | 0.018 | 0.065 |       | 0.226 | 0.113 | 0.098 |       | 0.107 |       | 0.301 | 0.086 | 0.186 |       | 0.146 | 0.159 | 0.061 | 0.134 | 0.505 |
| <i>Chaetura pelagica</i>        | 0.023 | 0.021 |       | 0.229 | 0.172 | 0.086 |       | 0.097 | 0.126 | 0.16  | 0.222 | 0.167 | 0.043 | 0.034 | 0.283 | 0.157 | 0.207 |       |
| <i>Charadrius vociferus</i>     | 0.021 | 0.011 |       | 0.109 | 0.083 | 0.132 | 0.275 | 0.078 | 0.067 | 0.149 | 0.097 | 0.156 | 0.051 | 0.029 | 0.14  | 0.049 | 0.216 | 0.191 |
| <i>Chlamydotis macqueenii</i>   | 0.017 | 0.032 |       | 0.071 | 0.149 | 0.055 |       | 0.162 | 0.079 | 0.139 | 0.14  | 0.197 | 0.064 |       | 0.173 | 0.069 | 0.284 | 0.214 |
| <i>Colius striatus</i>          |       | 0     |       | 0.13  | 0.1   | 0.017 |       | 0.073 | 0.103 | 0.169 | 0.08  | 0.173 | 0.07  |       | 0.163 | 0.072 |       | 0.263 |
| <i>Columba livia</i>            | 0.014 | 0.012 | 0.039 | 0.173 | 0.089 | 0.111 |       | 0.304 | 0.068 | 0.151 | 0.093 | 0.201 | 0.087 | 0.073 | 0.175 | 0.095 | 0.164 | 0.12  |
| <i>Corvus brachyrhynchos</i>    | 0.036 | 0.052 | 0.064 | 0.377 | 0.098 | 0.071 | 0.143 | 0.108 | 0.103 | 0.493 | 0.18  | 0.246 | 0.092 | 0.071 | 0.244 | 0.066 | 0.13  | 0.241 |
| <i>Cuculus canorus</i>          | 0.026 | 0.017 | 0.005 | 0.16  | 0.149 | 0.042 |       | 0.108 | 0.111 | 0.16  | 0.107 | 0.185 | 0.079 | 0.035 | 0.138 | 0.047 | 0.135 | 0.203 |
| <i>Egretta garzetta</i>         | 0.018 | 0.016 | 0.041 |       | 0.082 |       | 0.061 | 0.054 | 0.087 | 0.157 | 0.068 | 0.186 | 0.143 |       | 0.171 |       | 0.14  | 0.393 |
| <i>Eurypyga helias</i>          | 0.069 | 0.022 |       | 0.086 | 0.168 | 0.075 | 0.115 | 0.069 | 0.067 | 0.128 | 0.158 | 0.151 | 0.081 |       | 0.128 | 0.065 | 0.128 | 0.171 |
| <i>Falco peregrinus</i>         | 0.017 | 0.011 | 0.018 | 0.217 | 0.15  | 0.131 |       | 0.065 |       | 0.196 | 0.16  | 0.196 | 0.039 | 0.033 | 0.119 | 0.05  | 0.124 | 0.32  |
| <i>Fulmarus glacialis</i>       | 0.026 | 0.024 |       | 0.228 | 0.134 | 0.082 | 0.305 | 0.095 |       | 0.161 | 0.062 | 0.294 | 0.109 |       | 0.192 | 0.158 |       | 0.451 |
| <i>Gallus gallus</i>            | 0.016 | 0.006 | 0.018 | 0.139 | 0.112 | 0.064 |       | 0.162 | 0.08  | 0.168 | 0.089 | 0.066 | 0.115 | 0.016 | 0.2   | 0.063 | 0.131 | 0.218 |
| <i>Gavia stellata</i>           | 0.027 | 0.031 |       | 0.238 | 0.223 | 0.048 | 0.319 | 0.143 |       | 0.17  | 0.167 | 0.169 | 0.059 |       | 0.095 | 0.036 | 0.143 | 0.276 |
| <i>Geospiza fortis</i>          | 0.018 | 0.031 | 0.06  | 0.245 | 0.115 | 0.109 | 0.245 | 0.084 | 0.098 | 0.521 | 0.146 | 0.135 | 0.086 | 0.042 | 0.197 | 0.054 | 0.122 | 0.238 |
| <i>Haliaeetus albicilla</i>     | 0.065 | 0.015 |       | 0.078 | 0.134 | 0.203 |       | 0.143 | 0.1   | 0.279 | 0.09  | 0.173 | 0.018 |       | 0.166 | 0.061 |       | 0.566 |
| <i>Haliaeetus leucocephalus</i> | 0.032 | 0.014 | 0.011 | 0.078 | 0.14  | 0.243 |       | 0.143 | 0.054 | 0.177 | 0.09  | 0.173 | 0.017 | 0.084 | 0.166 | 0.061 | 0.118 | 0.281 |
| <i>Leptosomus discolor</i>      | 0.023 | 0.013 |       | 0.112 | 0.096 |       | 0.267 | 0.093 | 0.096 | 0.178 | 0.109 | 0.128 | 0.039 |       | 0.227 | 0.054 | 0.16  |       |
| <i>Manacus vitellinus</i>       | 0.022 | 0.092 | 0.068 | 0.249 | 0.142 | 0.081 |       | 0.115 | 0.092 | 0.353 | 0.288 | 0.204 | 0.122 | 0.047 | 0.178 | 0.076 | 0.094 | 0.233 |
| <i>Meleagris gallopavo</i>      | 0.008 | 0.008 |       | 0.129 | 0.084 | 0.039 |       | 0.167 | 0.093 | 0.167 | 0.075 | 0.071 | 0.111 | 0.008 | 0.163 |       | 0.13  | 0.169 |
| <i>Melopsittacus undulatus</i>  | 0.011 | 0.025 | 0.048 | 0.239 | 0.13  | 0.069 |       | 0.087 | 0.09  | 0.405 | 0.11  | 0.115 | 0.042 | 0.045 | 0.107 | 0.091 | 0.112 | 0.542 |
| <i>Merops nubicus</i>           | 0.019 | 0.015 |       | 0.224 | 0.112 | 0.041 |       | 0.081 | 0.083 | 0.19  | 0.081 | 0.167 | 0.057 | 0.063 | 0.102 | 0.09  | 0.117 |       |
| <i>Mesitornis unicolor</i>      | 0.023 | 0.022 |       | 0.23  | 0.098 | 0.244 | 0.281 | 0.131 | 0.11  | 0.119 | 0.103 | 0.332 | 0.082 | 0.04  | 0.202 | 0.138 | 0.144 | 0.17  |
| <i>Nestor notabilis</i>         | 0.015 | 0.014 | 0.051 | 0.273 | 0.142 | 0.151 |       | 0.064 | 0.13  | 0.395 | 0.114 | 0.184 | 0.05  | 0.044 | 0.118 | 0.077 |       | 0.561 |
| <i>Nipponia nippon</i>          | 0.012 | 0.022 | 0.042 | 0.249 | 0.146 | 0.075 | 0.311 | 0.057 | 0.108 | 0.149 | 0.071 | 0.272 | 0.04  | 0.138 | 0.149 | 0.077 | 0.167 |       |
| <i>Opisthocomus hoazin</i>      | 0.016 | 0.02  |       | 0.1   | 0.121 | 0.204 |       | 0.13  | 0.089 | 0.154 | 0.185 | 0.384 | 0.096 |       | 0.103 | 0.06  | 0.164 | 0.211 |
| <i>Pelecanus crispus</i>        | 0.015 | 0.021 |       | 0.236 | 0.063 | 0.114 | 0.27  | 0.103 | 0.09  | 0.126 | 0.09  | 0.341 | 0.033 |       | 0.1   |       |       | 0.463 |
| <i>Phaethon lepturus</i>        | 0.029 | 0.09  |       | 0.226 | 0.162 | 0.048 |       | 0.083 | 0.064 | 0.131 | 0.114 | 0.327 | 0.051 |       | 0.076 | 0.079 | 0.134 | 0.13  |
| <i>Phalacrocorax carbo</i>      | 0.077 | 0.033 | 0.058 | 0.243 | 0.096 | 0.27  |       | 0.104 | 0.102 | 0.135 | 0.093 | 0.203 | 0.067 |       | 0.112 | 0.035 |       | 0.441 |
| <i>Phoenicopiterus ruber</i>    | 0.015 | 0.031 |       | 0.221 | 0.122 | 0.063 |       | 0.042 | 0.056 | 0.137 | 0.076 | 0.245 |       |       | 0.074 | 0.109 |       | 0.145 |
| <i>Picoides pubescens</i>       | 0.027 | 0.011 | 0.045 | 0.226 | 0.106 | 0.139 | 0.27  | 0.137 | 0.084 | 0.291 | 0.089 | 0.171 | 0.082 | 0.041 | 0.094 | 0.09  | 0.149 | 0.216 |
| <i>Podiceps cristatus</i>       | 0.025 | 0     |       | 0.135 | 0.088 | 0.108 | 0.315 | 0.032 | 0.082 |       | 0.096 | 0.161 | 0.029 |       | 0.092 | 0.066 | 0.131 |       |
| <i>Pterocles gutturalis</i>     | 0.069 | 0.012 |       | 0.217 | 0.115 |       |       | 0.18  | 0.075 | 0.159 | 0.095 | 0.164 | 0.042 |       | 0.318 | 0.067 | 0.128 | 0.285 |
| <i>Pygoscelis adeliae</i>       | 0.079 | 0.208 |       | 0.232 | 0.225 | 0.095 | 0.343 | 0.123 |       | 0.172 | 0.105 | 0.22  | 0.185 |       | 0.135 | 0.137 | 0.098 | 0.322 |
| <i>Struthio camelus</i>         | 0.022 | 0.012 |       |       | 0.079 |       |       | 0.113 |       | 0     | 0.105 | 0.084 | 0.142 |       | 0.107 |       | 0.127 | 0.838 |
| <i>Taeniopygia guttata</i>      | 0.019 | 0.031 | 0.065 | 0.247 | 0.13  | 0.103 |       | 0.122 | 0.103 | 0.508 | 0.186 | 0.145 | 0.081 | 0.062 | 0.2   | 0.075 | 0.132 | 0.172 |
| <i>Tauraco erythrolophus</i>    | 0.024 | 0.017 |       | 0.245 | 0.097 | 0.043 |       | 0.093 | 0.081 | 0.174 | 0.087 | 0.199 | 0.092 |       | 0.092 | 0.056 | 0.19  | 0.134 |
| <i>Tinamus guttatus</i>         | 0.01  | 0.014 | 0.074 |       | 0.117 |       |       | 0.117 |       |       | 0.047 | 0.116 | 0.094 |       | 0.173 | 0     | 0.13  | 0.217 |
| <i>Tyto alba</i>                | 0.029 |       |       | 0.247 | 0.128 | 0.054 |       | 0.101 | 0.402 |       | 0.157 | 0.253 | 0.051 |       | 0.131 |       |       | 0.598 |
