# Supplementary material for: Gene loss, adaptive evolution and the co-evolution of plumage coloration genes with opsins in birds
Source: PubMed Central journal article supplement (PMC4595237; doi:10.1186/s12864-015-1924-3), 2015-10-06
Supplement: 12864_2015_1924_MOESM6_ESM.pdf [file 12864_2015_1924_MOESM6_ESM.pdf]

| Order           | Species                            | Assession number | ω background | ω foreground | ratio | aa seq 84-94 |   |   |   |   |   |   |   |   |   | Type |     |
|-----------------|------------------------------------|------------------|--------------|--------------|-------|--------------|---|---|---|---|---|---|---|---|---|------|-----|
| Accipitriformes | <i>Haliaeetus leucocephalus</i>    | XM_010568780.1   | 0.038        | 0.011        | 0.289 | L            | M | C | C | V | F | C | I | F | T | V    | VS  |
| Columbiformes   | <i>Columba livia</i>               | NM_001282821.1   | 0.035        | 0.039        | 1.114 | F            | L | A | C | I | I | C | I | F | T | V    | VS  |
| Cuculiformes    | <i>Cuculus canorus</i>             | XM_009563301.1   | 0.039        | 0.005        | 0.128 | F            | I | C | C | L | F | S | V | F | T | V    | VS  |
| Falconiformes   | <i>Falco cherrug</i>               | XM_005446545.1   | 0.038        | 0.018        | 0.474 | L            | M | C | C | V | F | C | I | F | T | V    | VS  |
| Galliformes     | <i>Gallus gallus</i>               | NM_205438.1      | 0.039        | 0.018        | 0.462 | F            | I | S | C | I | F | S | V | F | T | V    | VS  |
| Passeriformes   | <i>Corvus brachyrhynchos</i>       | XM_008637700.1   | 0.032        | 0.064        | 2.000 | F            | L | A | C | I | F | C | I | F | T | V    | VS  |
| Passeriformes   | <i>Euplectes afer</i>              | AY274223.1       | 0.031        | 0.072        | 2.323 | F            | L | A | C | I | F | C | I | F | T | V    | UVS |
| Passeriformes   | <i>Euplectes orix</i>              | AY274224.1       | 0.031        | 0.07         | 2.258 | F            | L | A | C | I | F | C | I | F | T | V    | UVS |
| Passeriformes   | <i>Ficedula albicollis</i>         | XM_005061513.1   | 0.031        | 0.063        | 2.032 | L            | M | C | C | V | F | C | I | F | T | V    | UVS |
| Passeriformes   | <i>Geospiza fortis</i>             | XM_005430818.1   | 0.032        | 0.06         | 1.875 | L            | M | C | C | V | F | C | I | F | T | V    | UVS |
| Passeriformes   | <i>Luscinia calliope</i>           | AY274226.1       | 0.031        | 0.061        | 1.968 | L            | M | C | C | V | F | C | I | F | T | V    | UVS |
| Passeriformes   | <i>Luscinia svecica</i>            | AY274225.1       | 0.031        | 0.059        | 1.903 | L            | M | C | C | V | F | C | I | F | T | V    | UVS |
| Passeriformes   | <i>Manacus vitellinus</i>          | XM_008925921.1   | 0.032        | 0.068        | 2.125 | L            | M | C | C | V | F | C | I | F | T | V    | VS  |
| Passeriformes   | <i>Parus caeruleus</i>             | AY274220.1       | 0.032        | 0.057        | 1.781 | F            | I | S | C | I | F | S | V | F | T | V    | UVS |
| Passeriformes   | <i>Pseudopodoces humilis</i>       | XM_005533413.1   | 0.032        | 0.059        | 1.844 | F            | I | S | C | I | F | S | V | F | T | V    | UVS |
| Passeriformes   | <i>Parus major</i>                 | AY274221.1       | 0.032        | 0.062        | 1.938 | L            | M | C | C | V | F | C | I | F | T | V    | UVS |
| Passeriformes   | <i>Parus palustris</i>             | AY274222.1       | 0.031        | 0.068        | 2.194 | F            | I | S | C | I | F | S | V | F | T | V    | UVS |
| Passeriformes   | <i>Serinus canaria</i>             | NM_001302100.1   | 0.03         | 0.071        | 2.367 | F            | L | A | C | I | F | C | I | F | T | V    | UVS |
| Passeriformes   | <i>Taeniopygia guttata</i>         | NM_001076704.1   | 0.031        | 0.065        | 2.097 | F            | L | S | C | I | F | S | V | F | T | V    | UVS |
| Pelecaniformes  | <i>Egretta garzetta</i>            | XM_009645256.1   | 0.035        | 0.041        | 1.171 | L            | M | C | C | V | F | C | I | F | T | V    | VS  |
| Pelecaniformes  | <i>Nipponia nippon</i>             | XM_009468025.1   | 0.035        | 0.042        | 1.200 | L            | M | C | C | V | F | C | I | F | T | V    | VS  |
| Pelecaniformes  | <i>Phalacrocorax carbo</i>         | EF568933.1       | 0.034        | 0.058        | 1.706 | F            | L | C | C | I | F | S | V | F | T | V    | VS  |
| Piciformes      | <i>Picoides pubescens</i>          | HM150794.1       | 0.035        | 0.045        | 1.286 | F            | M | C | C | I | F | S | V | F | T | V    | VS  |
| Psittaciformes  | <i>Barnardius zonarius</i>         | HM150799.1       | 0.033        | 0.052        | 1.576 | F            | V | S | C | V | L | S | V | F | V | V    | UVS |
| Psittaciformes  | <i>Cacatua galerita</i>            | HM150802.1       | 0.034        | 0.045        | 1.324 | F            | L | A | C | I | F | C | I | F | T | V    | UVS |
| Psittaciformes  | <i>Calyptorhynchus latirostris</i> | HM150800.1       | 0.034        | 0.045        | 1.324 | F            | I | S | C | I | F | S | V | F | T | V    | UVS |
| Psittaciformes  | <i>Eolophus roseicapilla</i>       | HM150801.1       | 0.034        | 0.05         | 1.471 | F            | L | A | C | I | F | C | I | F | T | V    | UVS |
| Psittaciformes  | <i>Melopsittacus undulatus</i>     | Y11787.1         | 0.034        | 0.048        | 1.412 | L            | M | C | C | V | F | C | I | F | T | V    | UVS |
| Psittaciformes  | <i>Nestor notabilis</i>            | XM_010021998.1   | 0.034        | 0.051        | 1.500 | L            | M | C | C | V | F | C | I | F | T | V    | UVS |
| Psittaciformes  | <i>Platycercus elegans</i>         | KF134492.1       | 0.034        | 0.051        | 1.500 | F            | I | S | C | I | F | S | V | F | T | V    | UVS |
| Sphenisciformes | <i>Spheniscus humboldti</i>        | AJ277991.1       | 0.036        | 0.031        | 0.861 | F            | I | S | C | I | F | S | V | F | T | V    | VS  |
| Tinamiformes    | <i>Tinamus guttatus</i>            | XM_010211816.1   | 0.035        | 0.074        | 2.114 | F            | I | F | C | V | F | C | V | F | M | V    | VS  |
