# Supplementary material for: Gene loss, adaptive evolution and the co-evolution of plumage coloration genes with opsins in birds
Source: PubMed Central journal article supplement (PMC4595237; doi:10.1186/s12864-015-1924-3), 2015-10-06
Supplement: 12864_2015_1924_MOESM7_ESM.pdf [file 12864_2015_1924_MOESM7_ESM.pdf]

1. Barn owl
2. Zebra finch
3. Chicken
4. Ostrinch

|  |      |      |    |      |    |      |   |       |      |     |     |     |     |     |   |     |    |    |     |    |   |   |   |   |   |   |   |   |   |   |   |   |   |   |   |   |   |   |   |   |   |   |   |   |   |   |   |   |   |   |   |   |   |    |
|--|------|------|----|------|----|------|---|-------|------|-----|-----|-----|-----|-----|---|-----|----|----|-----|----|---|---|---|---|---|---|---|---|---|---|---|---|---|---|---|---|---|---|---|---|---|---|---|---|---|---|---|---|---|---|---|---|---|----|
|  | MNGT | -GVN | FY | MPMS | NK | TGLV | R | ----- | -AEP | WKY | HVV | CCY | IFF | LIS | T | GSP | IN | LL | TLL | 60 |   |   |   |   |   |   |   |   |   |   |   |   |   |   |   |   |   |   |   |   |   |   |   |   |   |   |   |   |   |   |   |   |   |    |
|  | MNGT | E    | G  | I    | N  | F    | Y | V     | P    | M   | S   | N   | K   | T   | G | V   | R  | S  | P   | F  | E | Y | Q | Y | L | A | E | P | W | K | Y | R | L | V | C | C | Y | I | F | F | L | I | S | T | G | F | P | I | N | F | L | T | L | 60 |
|  | MNGT | E    | G  | I    | N  | F    | Y | V     | P    | M   | S   | N   | K   | T   | G | V   | R  | S  | P   | F  | E | Y | Q | Y | L | A | E | P | W | K | Y | R | L | V | C | C | Y | I | F | F | L | I | S | T | G | L | P | I | N | L | L | T | L | 60 |
|  | MNGT | E    | G  | I    | N  | F    | Y | V     | P    | M   | S   | N   | K   | T   | G | V   | R  | S  | P   | F  | E | Y | Q | Y | L | A | E | P | W | K | Y | R | V | V | C | C | Y | I | F | F | L | I | S | T | G | L | P | I | N | L | L | T | L | 60 |

|   |   |   |   |   |   |   |   |   |   |   |   |   |   |   |   |   |   |   |   |   |   |   |   |   |   |   |   |   |   |   |   |   |   |   |   |   |   |   |   |   |   |   |   |   |   |   |   |   |   |   |   |   |   |   |   |   |   |   |   |     |
|---|---|---|---|---|---|---|---|---|---|---|---|---|---|---|---|---|---|---|---|---|---|---|---|---|---|---|---|---|---|---|---|---|---|---|---|---|---|---|---|---|---|---|---|---|---|---|---|---|---|---|---|---|---|---|---|---|---|---|---|-----|
| 1 | V | T | F | K | H | K | L | R | Q | P | L | N | Y | I | L | V | N | L | A | V | A | D | L | F | M | A | C | F | G | F | T | V | T | F | Y | S | A | W | N | G | S | F | V | F | G | P | V | G | C | A | V | E | G | F | F | A | T | L | G | 120 |
| 2 | V | T | F | K | H | K | L | R | Q | P | L | N | Y | I | L | V | N | L | A | V | A | D | L | C | M | A | C | F | G | F | T | V | T | F | Y | T | A | W | N | G | Y | F | V | F | G | P | I | G | C | A | V | E | G | F | F | A | T | L | G | 120 |
| 3 | V | T | F | K | H | K | L | R | Q | P | L | N | Y | I | L | V | N | L | A | V | A | D | L | F | M | A | C | F | G | F | T | V | T | F | Y | T | A | W | N | G | Y | F | V | F | G | P | V | G | C | A | V | E | G | F | F | A | T | L | G | 120 |
| 4 | V | T | F | K | H | K | L | R | Q | P | L | N | Y | I | L | V | N | L | A | V | A | D | L | F | M | A | C | F | G | F | T | V | T | F | Y | T | A | W | N | G | Y | F | V | F | G | P | V | G | C | A | V | E | G | F | F | A | T | L | G | 120 |

|   |   |   |   |   |   |   |   |   |   |   |   |   |   |   |   |   |   |   |   |   |   |   |   |   |   |   |   |   |   |   |   |   |   |   |   |   |   |   |   |   |   |   |   |   |   |   |   |   |   |   |   |   |   |   |   |   |   |   |     |
|---|---|---|---|---|---|---|---|---|---|---|---|---|---|---|---|---|---|---|---|---|---|---|---|---|---|---|---|---|---|---|---|---|---|---|---|---|---|---|---|---|---|---|---|---|---|---|---|---|---|---|---|---|---|---|---|---|---|---|-----|
| 1 | G | Q | V | A | L | W | S | L | V | L | A | I | E | H | Y | I | I | C | K | P | M | G | N | F | R | F | S | T | T | H | A | M | G | G | I | A | F | T | W | I | M | A | L | S | C | A | A | P | P | L | F | G | * | S | R | Y | M | P | 180 |
| 2 | G | Q | V | A | L | W | S | L | V | L | A | I | E | R | Y | I | V | I | C | K | P | M | G | N | F | R | F | S | A | S | H | A | L | M | G | I | A | F | T | W | V | M | A | I | S | C | A | A | P | P | L | F | G | S | R | Y | I | P | 180 |
| 3 | G | Q | V | A | L | W | S | L | V | L | A | I | E | R | Y | I | V | V | C | K | P | M | G | N | F | R | F | S | A | S | H | A | M | M | G | I | A | F | T | W | V | M | A | F | S | C | A | A | P | P | L | F | G | S | R | Y | M | P | 180 |
| 4 | G | Q | V | A | L | W | S | L | V | L | A | I | E | R | Y | I | V | V | C | K | P | M | G | N | F | R | F | S | S | S | H | A | M | M | G | I | A | F | T | W | V | M | A | F | S | C | A | A | P | P | L | F | G | S | R | Y | M | P | 180 |

|   |   |   |   |   |   |   |   |   |   |   |   |   |   |   |   |   |   |   |   |   |   |   |   |   |   |   |   |   |   |   |   |   |   |   |   |   |   |   |   |   |   |   |   |   |   |   |   |   |   |   |   |   |   |   |   |   |   |   |     |     |
|---|---|---|---|---|---|---|---|---|---|---|---|---|---|---|---|---|---|---|---|---|---|---|---|---|---|---|---|---|---|---|---|---|---|---|---|---|---|---|---|---|---|---|---|---|---|---|---|---|---|---|---|---|---|---|---|---|---|---|-----|-----|
| 1 | E | G | M | Q | C | S | C | P | D | Y | C | T | H | N | A | D | Y | Y | N | E | S | Y | I | L | - | M | F | I | I | H | F | I | I | H | V | M | V | I | F | S | C | R | R | L | I | C | K | V | R | G | N | A | G | K | R | H | G | P | 240 |     |
| 2 | E | G | M | Q | C | S | C | G | P | D | Y | Y | T | H | N | - | D | F | H | N | E | S | Y | V | L | Y | M | F | V | I | H | F | I | I | P | V | V | I | I | F | S | Y | G | R | L | V | C | K | V | R | E | A | A | A | Q | Q | Q | E | S   | 240 |
| 3 | E | G | M | Q | C | S | C | G | P | D | Y | Y | T | H | N | - | D | Y | H | N | E | S | Y | V | L | Y | M | F | V | I | H | F | I | I | P | V | V | V | I | F | S | Y | G | R | L | I | C | K | V | R | E | A | A | A | Q | Q | Q | E | S   | 240 |
| 4 | E | G | M | Q | C | S | C | G | P | D | Y | Y | T | H | N | - | D | Y | H | N | E | S | Y | V | L | Y | M | F | V | I | H | F | I | I | P | V | V | V | I | F | S | Y | G | R | L | I | C | K | V | R | E | A | A | A | Q | Q | Q | E | S   | 240 |

|   |   |   |   |   |   |   |       |   |   |   |   |   |   |   |   |   |   |   |   |   |   |   |   |   |   |   |   |   |   |   |   |   |   |   |   |   |   |   |   |   |   |   |   |   |   |   |   |   |   |   |   |   |   |   |   |   |   |     |   |   |     |
|---|---|---|---|---|---|---|-------|---|---|---|---|---|---|---|---|---|---|---|---|---|---|---|---|---|---|---|---|---|---|---|---|---|---|---|---|---|---|---|---|---|---|---|---|---|---|---|---|---|---|---|---|---|---|---|---|---|---|-----|---|---|-----|
| 1 | G | W | A | G | E | G | ----- | T | C | M | V | I | L | M | V | L | G | F | M | L | S | W | T | P | Y | A | V | V | A | F | W | I | F | T | N | K | G | A | D | F | I | A | T | L | M | A | V | P | A | F | S | S | K | S | S | S | L | 300 |   |   |     |
| 2 | A | T | T | Q | K | A | E     | K | E | V | T | R | M | V | I | L | M | V | L | G | F | M | L | A | W | T | P | Y | A | V | V | A | F | W | I | F | T | N | K | G | A | D | F | T | A | T | L | M | A | V | P | A | F | F | S | K | S | S   | S | L | 300 |
| 3 | A | T | T | Q | K | A | E     | K | E | V | T | R | M | V | I | L | M | V | L | G | F | M | L | A | W | T | P | Y | A | V | V | A | F | W | I | F | T | N | K | G | A | D | F | T | A | T | L | M | A | V | P | A | F | F | S | K | S | S   | S | L | 300 |
| 4 | A | T | T | Q | K | A | E     | K | E | V | T | R | M | V | I | L | M | V | L | G | F | M | L | A | W | T | P | Y | A | V | V | A | F | W | I | F | T | N | K | G | A | D | F | T | A | T | L | M | S | V | P | A | F | F | S | K | S | S   | S | L | 300 |

|   |   |   |   |   |   |   |   |   |   |   |   |   |   |   |   |   |   |   |   |   |   |   |   |   |   |   |   |   |   |   |   |   |   |   |   |   |   |   |   |   |   |   |   |   |   |   |   |   |   |   |   |     |   |   |     |
|---|---|---|---|---|---|---|---|---|---|---|---|---|---|---|---|---|---|---|---|---|---|---|---|---|---|---|---|---|---|---|---|---|---|---|---|---|---|---|---|---|---|---|---|---|---|---|---|---|---|---|---|-----|---|---|-----|
| 1 | Y | N | P | V | I | Y | I | F | M | N | K | Q | F | R | H | C | M | I | T | I | C | C | G | K | N | P | F | E | D | I | S | S | N | I | A | Q | G | K | T | E | V | S | S | S | S | S | Q | V | S | P | A | 300 |   |   |     |
| 2 | Y | N | P | I | I | Y | V | L | M | N | K | Q | F | R | N | C | M | I | T | I | C | C | G | K | N | P | F | G | D | E | E | T | S | S | T | V | S | S | S | K | T | E | V | T | S | V | S | S | S | Q | V | S   | P | I | 300 |
| 3 | Y | N | P | I | I | Y | V | L | M | N | K | Q | F | R | N | C | M | I | T | I | C | C | G | K | N | P | F | G | D | E | D | V | S | S | T | V | S | S | S | K | T | E | V | S | S | V | S | S | S | Q | V | S   | P | - | 300 |
| 4 | Y | N | P | I | I | Y | V | L | M | N | K | Q | F | R | N | C | M | I | T | I | C | C | G | K | N | P | F | G | D | E | E | V | S | S | T | V | S | S | S | K | T | E | V | S | S | V | S | S | S | Q | V | S   | P | A | 300 |
