# Supplementary material for: Gene loss, adaptive evolution and the co-evolution of plumage coloration genes with opsins in birds
Source: PubMed Central journal article supplement (PMC4595237; doi:10.1186/s12864-015-1924-3), 2015-10-06
Supplement: 12864_2015_1924_MOESM8_ESM.pdf [file 12864_2015_1924_MOESM8_ESM.pdf]

| <b>Gene</b>  | <b>Lnl H0</b> | <b>ωb</b> | <b>Lnl H1.1</b> | <b>LRT</b> | <b>p-value</b> | <b>ωf</b> | <b>Lnl H1.2</b> | <b>LRT</b> | <b>p-value</b> | <b>ωf</b> |
|--------------|---------------|-----------|-----------------|------------|----------------|-----------|-----------------|------------|----------------|-----------|
| <i>RH1</i>   | -7492.031     | 0.043     | -7490.671       | 2.721      | 0.099          | 0.137     | -7489.300       | 5.464      | <b>0.019</b>   | 0.119     |
| <i>RH2</i>   | -9263.000     | 0.045     |                 |            |                |           | -9262.362       | 1.276      | 0.259          | 0.091     |
| <i>OPN4x</i> | -11344.030    | 0.155     | -11343.624      | 0.813      | 0.367          | 0.211     | -11340.842      | 6.376      | <b>0.012</b>   | 0.546     |
| <i>OPN4m</i> | -7364.207     | 0.196     | -7363.348       | 1.719      | 0.190          | 0.342     | -7362.636       | 3.142      | 0.076          | 1.337     |
| <i>TMT2</i>  | -4796.769     | 0.110     | -4796.765       | 0.009      | 0.924          | 0.118     | -4796.722       | 0.094      | 0.759          | 0.079     |
| <i>OPN3</i>  | -3662.170     | 0.094     | -3662.052       | 0.237      | 0.627          | 0.065     | -3661.860       | 0.620      | 0.431          | 0.000     |
| <i>PIN</i>   | -12822.260    | 0.146     | -12806.401      | 31.718     | <b>0.000</b>   | 0.548     | -12812.983      | 18.554     | <b>0.000</b>   | 0.527     |
| <i>RGR</i>   | -7675.894     | 0.126     | -7675.623       | 0.543      | 0.461          | 0.181     | -7675.465       | 0.859      | 0.354          | 0.221     |
| <i>RRH</i>   | -6965.018     | 0.134     | -6963.813       | 2.409      | 0.121          | 0.259     | -6964.692       | 0.653      | 0.419          | 0.061     |
| <i>OPN5</i>  | -8430.477     | 0.107     | -8430.477       | 0.000      | 0.998          | 0.107     | -8427.480       | 5.993      | <b>0.014</b>   | 0.408     |
| <i>VA</i>    | -8942.038     | 0.236     |                 |            |                |           | -8941.362       | 1.352      | 0.245          | 0.471     |
| <i>TMT</i>   | -2891.969     | 0.211     |                 |            |                |           | -2890.972       | 1.994      | 0.158          | 0.591     |
