# Supplementary material for: Gene loss, adaptive evolution and the co-evolution of plumage coloration genes with opsins in birds
Source: PubMed Central journal article supplement (PMC4595237; doi:10.1186/s12864-015-1924-3), 2015-10-06
Supplement: 12864_2015_1924_MOESM9_ESM.pdf [file 12864_2015_1924_MOESM9_ESM.pdf]

|                | <i>MCIR</i>    | <i>TYR</i>    | <i>TYRPI</i>  | <i>OCA2</i>   | <i>ASIP</i>   |
|----------------|----------------|---------------|---------------|---------------|---------------|
| <i>RH1</i>     | 3.503 (0.591)  | 0.115 (0.340) | 1.307 (0.275) | 0.494 (0.308) | 0.000 (0.375) |
|                | <b>0.031</b>   | 0.633         | 0.874         | 0.759         | 0.500         |
| <i>RH2</i>     | 10.194 (0.727) | 1.304 (0.283) | 0.080 (0.341) | 2.533 (0.237) | 1.068 (0.282) |
|                | <b>0.000</b>   | 0.873         | 0.611         | 0.944         | 0.849         |
| <i>OPN1sw1</i> |                | 1.133 (0.529) | 0.000 (0.375) |               | 1.667 (0.188) |
|                |                | 0.144         | 0.500         |               | 0.902         |
| <i>OPN4m</i>   | 0.303 (0.455)  | 2.739 (0.244) | 0.667 (0.300) | 0.000 (0.389) | 1.186 (0.474) |
|                | 0.291          | 0.951         | 0.793         | 0.500         | 0.138         |
| <i>OPN4x</i>   | 2.048 (0.545)  | 0.022 (0.354) | 0.470 (0.439) | 1.862 (0.256) | 0.366 (0.317) |
|                | 0.076          | 0.559         | 0.247         | 0.914         | 0.727         |
| <i>TMT2</i>    | 0.012 (0.409)  | 0.039 (0.349) | 0.007 (0.395) | 0.008 (0.353) | 0.016 (0.351) |
|                | 0.456          | 0.578         | 0.467         | 0.535         | 0.551         |
| <i>TMT</i>     |                | 3.267 (0.125) |               |               |               |
|                |                | 0.965         |               |               |               |
| <i>OPN3</i>    | 0.982 (0.500)  | 0.022 (0.354) | 0.860 (0.293) | 0.002 (0.359) | 0.860 (0.293) |
|                | 0.161          | 0.559         | 0.823         | 0.516         | 0.823         |
| <i>PIN</i>     | 1.267 (0.526)  | 0.027 (0.350) | 0.008 (0.353) | 0.033 (0.406) | 0.384 (0.441) |
|                | 0.130          | 0.565         | 0.535         | 0.428         | 0.268         |
| <i>VA</i>      | 0.594 (0.273)  | 0.037 (0.400) | 1.862 (0.256) | 1.314 (0.270) | 5.171 (0.564) |
|                | 0.780          | 0.424         | 0.914         | 0.874         | <b>0.011</b>  |
| <i>RGR</i>     | 0.109 (0.318)  | 1.089 (0.458) | 0.080 (0.341) | 0.494 (0.308) | 0.366 (0.317) |
|                | 0.629          | 0.148         | 0.611         | 0.759         | 0.727         |
| <i>RRH</i>     | 2.048 (0.545)  | 0.200 (0.333) | 2.733 (0.512) | 0.138 (0.333) | 1.771 (0.488) |
|                | 0.076          | 0.673         | <b>0.049</b>  | 0.645         | 0.092         |
| <i>OPN5</i>    | 0.000 (0.381)  | 0.145 (0.413) | 0.138 (0.333) | 0.344 (0.316) | 1.068 (0.282) |
|                | 0.500          | 0.352         | 0.645         | 0.721         | 0.849         |
