# Supplementary material for: Gene loss, adaptive evolution and the co-evolution of plumage coloration genes with opsins in birds
Source: PubMed Central journal article supplement (PMC4595237; doi:10.1186/s12864-015-1924-3), 2015-10-06

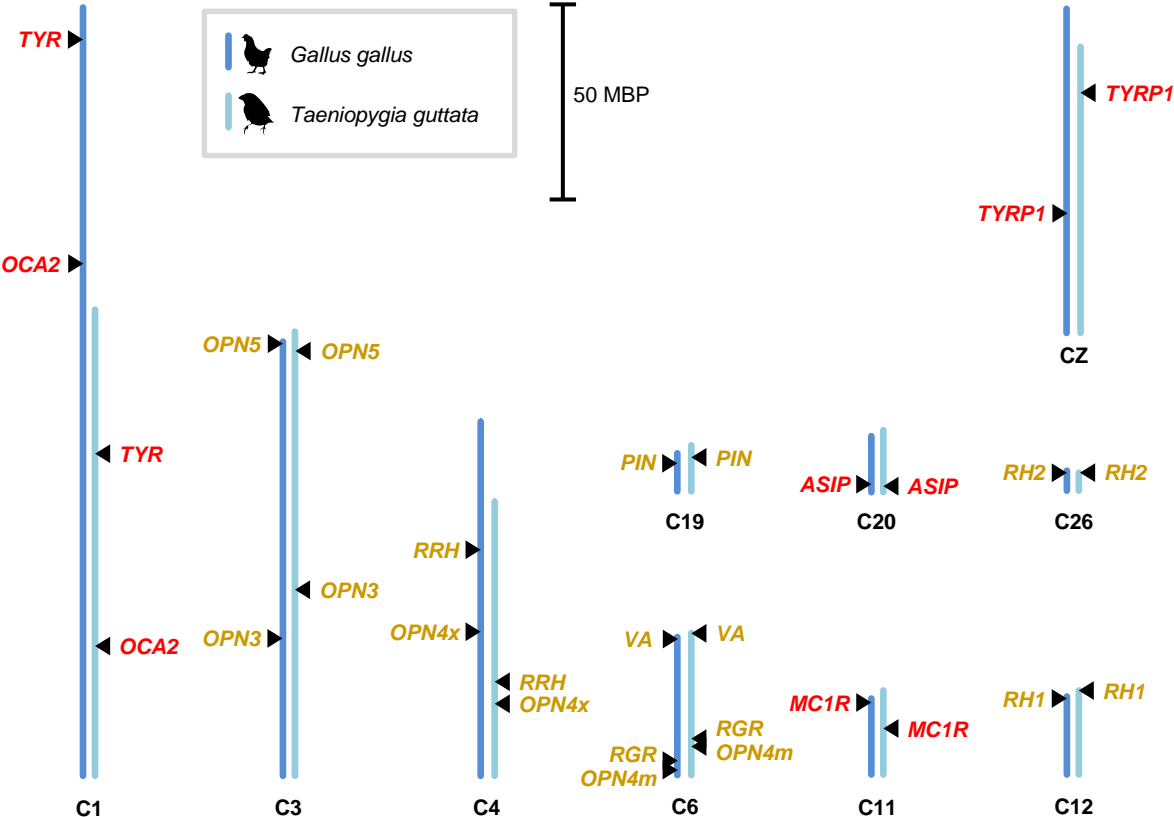

Supplement: 12864_2015_1924_MOESM10_ESM.pdf [file 12864_2015_1924_MOESM10_ESM.pdf]
