# Supplementary material for: Gene loss, adaptive evolution and the co-evolution of plumage coloration genes with opsins in birds
Source: PubMed Central journal article supplement (PMC4595237; doi:10.1186/s12864-015-1924-3), 2015-10-06
Supplement: 12864_2015_1924_MOESM11_ESM.pdf [file 12864_2015_1924_MOESM11_ESM.pdf]

| Species                         | <i>RH1</i>    | <i>RH2</i>    | <i>OPN1lw</i> | <i>OPN1sw1</i> | <i>OPN1sw2</i> |
|---------------------------------|---------------|---------------|---------------|----------------|----------------|
| <i>Acanthisitta chloris</i>     | Ach_R014274   | Ach_R000688   | scaffold43966 | scaffold30285  | scaffold10992  |
| <i>Anas platyrhynchos</i>       | Apl_R005227   | Apl_R003993   | scaffold4890  | scaffold3520   | scaffold4820   |
| <i>Apaloderma vittatum</i>      | Avi_R005355   | Avi_R006088   | *             | scaffold41128  | *              |
| <i>Aptenodytes forsteri</i>     | Afo_R007386   | Afo_R002078   | *             | Scaffold310    | C12507740      |
| <i>Balearica regulorum</i>      | Bre_R001278   | scaffold11087 | *             | scaffold8923   | scaffold39215  |
| <i>Buceros rhinoceros</i>       | Brh_R008392   | Brh_R008642   | *             | scaffold38089  | C11394968      |
| <i>Calypte anna</i>             | Aan_R004439   | Aan_R003786   | Aan_R011178   | *              | C10539872      |
| <i>Caprimugus carolinensis</i>  | Cca_R005137   | Cca_R004539   | scaffold26893 | scaffold13699  | *              |
| <i>Cariama cristata</i>         | Ccr_R004716   | Ccr_R005087   | *             | scaffold38702  | *              |
| <i>Cathartes aura</i>           | Cau_R009896   | Cau_R006157   | C11745660     | scaffold64787  | C11974873      |
| <i>Chaetura pelagica</i>        | Cpe_R007780   | Cpe_R013784   | scaffold672   | *              | scaffold1770   |
| <i>Charadrius vociferus</i>     | Cvo_R010602   | Cvo_R006669   | C14507241     | scaffold904    | C14818156      |
| <i>Chlamydotis macqueenii</i>   | Cun_R013315   | Cun_R007701   | *             | scaffold52620  | C14725356      |
| <i>Colius striatus</i>          | scaffold42806 | Cst_R013138   | C16138835     | scaffold37144  | scaffold54278  |
| <i>Columba livia</i>            | Cli_R008776   | Cli_R015197   | Cli_R015862   | Cli_R001560    | Cli_R015863    |
| <i>Corvus brachyrhynchos</i>    | Cbr_R016243   | Cbr_R014787   | scaffold807   | Cbr_R004875    | scaffold807    |
| <i>Cuculus canorus</i>          | Cca_R014544   | Cca_R011163   | C22900967     | Cca_R007387    | scaffold3131   |
| <i>Egretta garzetta</i>         | Ega_R008103   | Ega_R000386   | C7947834      | scaffold358    | C8058550       |
| <i>Eurypyga helias</i>          | Ehe_R013415   | Ehe_R013243   | *             | C15119946      | scaffold35332  |
| <i>Falco peregrinus</i>         | Fpe_R004520   | Fpe_R005139   | scaffold923_1 | scaffold371_1  | scaffold600_1  |
| <i>Fulmarus glacialis</i>       | Fgl_R000766   | Fgl_R006900   | *             | scaffold30526  | scaffold32963  |
| <i>Gavia stellata</i>           | Gst_R009594   | Gst_R007390   | *             | C12403080      | *              |
| <i>Geospiza fortis</i>          | Gfo_R002165   | Gfo_R002973   | scaffold2279  | Gfo_R008669    | C12744453      |
| <i>Haliaeetus albicilla</i>     | Hal_R005432   | Hal_R007579   | *             | scaffold9295   | *              |
| <i>Haliaeetus leucocephalus</i> | Hle_R005132   | Hle_R012171   | Scaffold132   | Hle_R008118    | Scaffold3705   |
| <i>Leptosomus discolor</i>      | Ldi_R004003   | Ldi_R003079   | C11613766     | Scaffold41452  | C11468432      |
| <i>Manacus vitellinus</i>       | Mvi_R014802   | Mvi_R013642   | C10202426     | Mvi_R005863    | C10381930      |
| <i>Meleagris gallopavo</i>      | Mga_R004540   | Mga_R009279   | *             | 15             | *              |
| <i>Melopsittacus undulatus</i>  | Mun_R006269   | Mun_R003263   | *             | *              | *              |
| <i>Merops nubicus</i>           | Mnu_R010479   | Mnu_R007380   | *             | *              | *              |
| <i>Mesitornis unicolor</i>      | Mun_R010774   | Mun_R000739   | scaffold22783 | C13007704      | scaffold42191  |
| <i>Nestor notabilis</i>         | Nno_R003001   | Nno_R004006   | scaffold27814 | Nno_R004976    | scaffold27473  |
| <i>Nipponia nippon</i>          | Nni_R014514   | Nni_R010909   | Scaffold2747  | Nni_R013924    | Scaffold2747   |
| <i>Opisthocomus hoazin</i>      | Oho_R001071   | Oho_R001168   | *             | scaffold1001   | *              |
| <i>Pelecanus crispus</i>        | Pcr_R007634   | Pcr_R007325   | *             | C6960666       | *              |
| <i>Phaethon lepturus</i>        | Ple_R011293   | Ple_R005725   | *             | scaffold27297  | *              |
| <i>Phalacrocorax carbo</i>      | Pca_R000096   | Pca_R001029   | *             | *              | *              |
| <i>Phoenicopterus ruber</i>     | Pru_R011144   | Pru_R006483   | *             | C16030346      | *              |
| <i>Picoides pubescens</i>       | Ppu_R002287   | Ppu_R009745   | C40097764     | Ppu_R009312    | Ppu_R003169    |
| <i>Podiceps cristatus</i>       | Pcr_R005418   | Pcr_R008848   | *             | scaffold36774  | *              |
| <i>Pterocles gutturalis</i>     | Pgu_R008658   | Pgu_R012270   | scaffold18039 | scaffold34007  | scaffold14537  |
| <i>Pygoscelis adeliae</i>       | Pad_R007548   | Pad_R004695   | C9772274      | C9752044       | *              |
| <i>Struthio camelus</i>         | Sca_R016073   | Sca_R011489   | *             | *              | scaffold1886   |
| <i>Tauraco erythrolophus</i>    | Ter_R010357   | Ter_R006249   | *             | scaffold30365  | *              |
| <i>Tinamus guttatus</i>         | Tma_R011592   | Tma_R007266   | C15395113     | Tma_R005000    | scaffold13658  |
| <i>Tyto alba</i>                | Tal_R010820   | Tal_R007273   | *             | *              | *              |

| Species                         | OPN4m       | OPN4x       | TMT2        | TMT           | OPN3          |
|---------------------------------|-------------|-------------|-------------|---------------|---------------|
| <i>Acanthisitta chloris</i>     | Ach_R001224 | Ach_R001141 | Ach_R012812 | *             | Ach_R005051   |
| <i>Anas platyrhynchos</i>       | Apl_R003228 | Apl_R001728 | Apl_R006312 | *             | Apl_R000897   |
| <i>Apaloderma vittatum</i>      | Avi_R003920 | Avi_R001566 | Avi_R010131 | *             | Avi_R006711   |
| <i>Aptenodytes forsteri</i>     | Afo_R000425 | Afo_R015633 | Afo_R015920 | Afo_R009918   | Afo_R000248   |
| <i>Balearica regulorum</i>      | Bre_R011216 | Bre_R009736 | Bre_R000730 | scaffold519   | Bre_R000424   |
| <i>Buceros rhinoceros</i>       | Brh_R003376 | Brh_R009958 | Brh_R004335 | *             | Brh_R008074   |
| <i>Calypte anna</i>             | Aan_R009582 | Aan_R005208 | Aan_R003171 | *             | Aan_R007013   |
| <i>Caprimugus carolinensis</i>  | Cca_R013356 | Cca_R013105 | Cca_R012283 | Cca_R004789   | Cca_R008857   |
| <i>Cariama cristata</i>         | Ccr_R002694 | Ccr_R011020 | Ccr_R012244 | *             | Ccr_R012148   |
| <i>Cathartes aura</i>           | Cau_R007941 | Cau_R013353 | Cau_R002259 | scaffold43101 | Cau_R012651   |
| <i>Chaetura pelagica</i>        | Cpe_R008180 | Cpe_R005108 | Cpe_R001898 | *             | Cpe_R006702   |
| <i>Charadrius vociferus</i>     | Cvo_R010420 | Cvo_R010129 | Cvo_R016531 | Cvo_R013965   | Cvo_R007685   |
| <i>Chlamydotis macqueenii</i>   | Cun_R000826 | Cun_R012921 | Cun_R012345 | *             | Cun_R003358   |
| <i>Colius striatus</i>          | Cst_R006583 | Cst_R007760 | Cst_R012706 | *             | Cst_R001751   |
| <i>Columba livia</i>            | Cli_R009647 | Cli_R007017 | Cli_R005022 | *             | Cli_R005630   |
| <i>Corvus brachyrhynchos</i>    | Cbr_R007418 | Cbr_R006170 | Cbr_R015319 | Cbr_R006030   | Cbr_R013263   |
| <i>Cuculus canorus</i>          | Cca_R011740 | Cca_R006810 | Cca_R007498 | *             | Cca_R007991   |
| <i>Egretta garzetta</i>         | scaffold280 | Ega_R014927 | Ega_R011783 | Ega_R002951   | scaffold248   |
| <i>Eurypyga helias</i>          | Ehe_R001763 | Ehe_R002676 | Ehe_R001690 | Ehe_R003531   | Ehe_R012682   |
| <i>Falco peregrinus</i>         | Fpe_R008091 | Fpe_R012248 | Fpe_R016144 | *             | Fpe_R005610   |
| <i>Fulmarus glacialis</i>       | Fgl_R011238 | Fgl_R008649 | Fgl_R012037 | Fgl_R011481   | Fgl_R006359   |
| <i>Gavia stellata</i>           | Gst_R002007 | Gst_R004211 | Gst_R009280 | Gst_R002112   | Gst_R011107   |
| <i>Geospiza fortis</i>          | Gfo_R002543 | Gfo_R000912 | Gfo_R005581 | Gfo_R000463   | Gfo_R003748   |
| <i>Haliaeetus albicilla</i>     | Hal_R002915 | Hal_R004749 | Hal_R000785 | *             | Hal_R001996   |
| <i>Haliaeetus leucocephalus</i> | Hle_R000301 | Hle_R003722 | Hle_R003707 | *             | Hle_R010883   |
| <i>Leptosomus discolor</i>      | Ldi_R003466 | Ldi_R007922 | Ldi_R012455 | Ldi_R011148   | scaffold28918 |
| <i>Manacus vitellinus</i>       | Mvi_R004971 | Mvi_R008071 | Mvi_R004631 | *             | Mvi_R000726   |
| <i>Meleagris gallopavo</i>      | Mga_R013741 | Mga_R010815 | Mga_R001808 | *             | Mga_R006440   |
| <i>Melopsittacus undulatus</i>  | Mun_R013934 | Mun_R009058 | Mun_R011665 | *             | Mun_R006485   |
| <i>Merops nubicus</i>           | Mnu_R005078 | Mnu_R013336 | Mnu_R002741 | *             | Mnu_R000042   |
| <i>Mesitornis unicolor</i>      | Mun_R010255 | Mun_R003555 | Mun_R004968 | Mun_R001569   | Mun_R006478   |
| <i>Nestor notabilis</i>         | Nno_R013303 | Nno_R005879 | Nno_R008442 | *             | Nno_R013820   |
| <i>Nipponia nippon</i>          | Nni_R012773 | Nni_R001008 | Nni_R002849 | Nni_R001657   | Nni_R000220   |
| <i>Opisthocomus hoazin</i>      | Oho_R002541 | Oho_R002893 | Oho_R014763 | *             | Oho_R002783   |
| <i>Pelecanus crispus</i>        | Pcr_R007180 | Pcr_R008160 | Pcr_R004060 | Pcr_R014396   | Pcr_R001432   |
| <i>Phaethon lepturus</i>        | Ple_R009482 | Ple_R011463 | Ple_R001502 | scaffold43492 | Ple_R000756   |
| <i>Phalacrocorax carbo</i>      | Pca_R002233 | Pca_R009405 | Pca_R002610 | scaffold4977  | Pca_R012581   |
| <i>Phoenicopterus ruber</i>     | Pru_R013367 | Pru_R004016 | Pru_R011480 | scaffold29446 | Pru_R005042   |
| <i>Picoides pubescens</i>       | Ppu_R009502 | Ppu_R007138 | Ppu_R009199 | Ppu_R006252   | Ppu_R003550   |
| <i>Podiceps cristatus</i>       | Pcr_R011580 | Pcr_R010356 | Pcr_R012678 | Pcr_R004160   | Pcr_R007428   |
| <i>Pterocles gutturalis</i>     | Pgu_R008215 | Pgu_R004019 | Pgu_R008581 | *             | scaffold52099 |
| <i>Pygoscelis adeliae</i>       | Pad_R008885 | Pad_R013289 | Pad_R003148 | Pad_R014502   | Pad_R014030   |
| <i>Struthio camelus</i>         | scaffold310 | Sca_R006216 | Sca_R014327 | Sca_R010905   | scaffold367   |
| <i>Tauraco erythrolophus</i>    | Ter_R010818 | Ter_R002755 | Ter_R015046 | *             | Ter_R014568   |
| <i>Tinamus guttatus</i>         | Tma_R001937 | Tma_R008516 | Tma_R002341 | *             | Tma_R010398   |
| <i>Tyto alba</i>                | Tal_R011509 | Tal_R001976 | Tal_R013018 | *             | Tal_R007498   |

| Species                         | <i>PIN</i>  | <i>VA</i>     | <i>RGR</i>  | <i>RRH</i>  | <i>OPN5</i>    |
|---------------------------------|-------------|---------------|-------------|-------------|----------------|
| <i>Acanthisitta chloris</i>     | C16157070   | Ach_R011655   | Ach_R013917 | Ach_R003910 | XM_009081264.1 |
| <i>Anas platyrhynchos</i>       | Apl_R005168 | Apl_R014177   | Apl_R003214 | Apl_R014026 | XM_005012930.1 |
| <i>Apaloderma vittatum</i>      | Avi_R013589 | Avi_R005681   | Avi_R001147 | Avi_R002418 | XM_009873315.1 |
| <i>Aptenodytes forsteri</i>     | Afo_R013563 | Afo_R002916   | Afo_R001551 | Afo_R015696 | XM_009273858.1 |
| <i>Balearica regulorum</i>      | Bre_R000859 | Bre_R000642   | Bre_R001897 | Bre_R005316 | XM_010302599.1 |
| <i>Buceros rhinoceros</i>       | Brh_R013509 | Brh_R011866   | Brh_R011273 | Brh_R002677 | XM_010142294.1 |
| <i>Calypte anna</i>             | Aan_R011213 | Aan_R010452   | Aan_R012485 | Aan_R005179 | XM_008490719.1 |
| <i>Caprimugus carolinensis</i>  | Cca_R006665 | Cca_R011029   | Cca_R001020 | Cca_R013387 | XM_010174807.1 |
| <i>Cariama cristata</i>         | Ccr_R004711 | Ccr_R007095   | Ccr_R006703 | Ccr_R004757 | XM_009701094.1 |
| <i>Cathartes aura</i>           | *           | Cau_R007663   | Cau_R006452 | Cau_R011607 | scaffold440501 |
| <i>Chaetura pelagica</i>        | Cpe_R013541 | Cpe_R004165   | Cpe_R008196 | Cpe_R014667 | XM_010002392.1 |
| <i>Charadrius vociferus</i>     | Cvo_R015435 | Cvo_R009442   | Cvo_R010435 | Cvo_R012588 | XM_009885296.1 |
| <i>Chlamydotis macqueenii</i>   | Cun_R011675 | Cun_R009552   | Cun_R001574 | Cun_R006475 | XM_010120848.1 |
| <i>Colius striatus</i>          | Cst_R006686 | Cst_R010103   | Cst_R011582 | Cst_R009961 | XM_010199969.1 |
| <i>Columba livia</i>            | Cli_R012115 | Cli_R001640   | Cli_R012948 | Cli_R016297 | XM_005510202.1 |
| <i>Corvus brachyrhynchos</i>    | Cbr_R007748 | Cbr_R012082   | Cbr_R007434 | Cbr_R004289 | XM_008641820.1 |
| <i>Cuculus canorus</i>          | Cca_R012507 | Cca_R010500   | Cca_R011757 | Cca_R001866 | XM_009558441.1 |
| <i>Egretta garzetta</i>         | Ega_R000861 | Ega_R015166   | Ega_R006443 | Ega_R010020 | XM_009639608.1 |
| <i>Eurypyga helias</i>          | Ehe_R012817 | Ehe_R008692   | Ehe_R003031 | Ehe_R012194 | XM_010149210.1 |
| <i>Falco peregrinus</i>         | *           | Fpe_R008757   | Fpe_R008106 | Fpe_R006767 | XM_005239189.1 |
| <i>Fulmarus glacialis</i>       | *           | Fgl_R013036   | Fgl_R011993 | Fgl_R001878 | XM_009587844.1 |
| <i>Gavia stellata</i>           | *           | Gst_R002069   | Gst_R009355 | Gst_R001159 | XM_009817945.1 |
| <i>Geospiza fortis</i>          | Gfo_R012798 | Gfo_R008627   | Gfo_R002528 | Gfo_R000958 | XM_005418407.1 |
| <i>Haliaeetus albicilla</i>     | Hal_R001793 | Hal_R013789   | Hal_R003830 | Hal_R012291 | XM_009915908.1 |
| <i>Haliaeetus leucocephalus</i> | Hle_R010722 | Hle_R008545   | Hle_R010002 | Hle_R007366 | XM_010584279.1 |
| <i>Leptosomus discolor</i>      | Ldi_R005008 | Ldi_R002540   | Ldi_R005745 | Ldi_R001421 | XM_009948078.1 |
| <i>Manacus vitellinus</i>       | Mvi_R015224 | Mvi_R001566   | Mvi_R006107 | Mvi_R000585 | XM_008927044.1 |
| <i>Meleagris gallopavo</i>      | Mga_R007839 | Mga_R014261   | Mga_R013723 | Mga_R011100 | XM_010708184.1 |
| <i>Melopsittacus undulatus</i>  | Mun_R003348 | Mun_R004570   | Mun_R013919 | Mun_R009000 | XM_005146432.1 |
| <i>Merops nubicus</i>           | Mnu_R002284 | Mnu_R006973   | Mnu_R000635 | Mnu_R005172 | XM_008940418.1 |
| <i>Mesitornis unicolor</i>      | Mun_R001769 | Mun_R011983   | Mun_R014433 | Mun_R005332 | XM_010178658.1 |
| <i>Nestor notabilis</i>         | Nno_R008673 | Nno_R002048   | Nno_R009491 | Nno_R001823 | Nno_R013070    |
| <i>Nipponia nippon</i>          | Nni_R006596 | Nni_R013156   | Nni_R012758 | Nni_R000942 | XM_009467326.1 |
| <i>Opisthocomus hoazin</i>      | Oho_R012156 | Oho_R004817   | Oho_R001256 | Oho_R000992 | XM_009937828.1 |
| <i>Pelecanus crispus</i>        | Pcr_R006937 | Pcr_R012292   | Pcr_R012529 | Pcr_R013678 | XM_009492185.1 |
| <i>Phaethon lepturus</i>        | Ple_R010350 | Ple_R012232   | Ple_R002415 | Ple_R006613 | XM_010292092.1 |
| <i>Phalacrocorax carbo</i>      | Pca_R004459 | Pca_R009809   | Pca_R008814 | Pca_R010769 | XM_009500831.1 |
| <i>Phoenicopterus ruber</i>     | Pru_R000649 | Pru_R006632   | Pru_R012832 | Pru_R009308 | scaffold19272  |
| <i>Picoides pubescens</i>       | Ppu_R007334 | Ppu_R001292   | Ppu_R009519 | Ppu_R012373 | XM_009905310.1 |
| <i>Podiceps cristatus</i>       | Pcr_R006037 | scaffold55602 | Pcr_R002939 | Pcr_R004406 | Pcr_R011050    |
| <i>Pterocles gutturalis</i>     | Pgu_R009989 | Pgu_R004550   | Pgu_R007305 | Pgu_R011442 | XM_010086910.1 |
| <i>Pygoscelis adeliae</i>       | Pad_R007184 | Pad_R009724   | Pad_R008871 | Pad_R008435 | XM_009319665.1 |
| <i>Struthio camelus</i>         | *           | Sca_R002519   | Sca_R007528 | Sca_R012133 | XM_009667941.1 |
| <i>Tauraco erythrolophus</i>    | Ter_R015417 | Ter_R001995   | Ter_R014106 | Ter_R013837 | XM_009982410.1 |
| <i>Tinamus guttatus</i>         | *           | scaffold2217  | Tma_R004075 | Tma_R010431 | XM_010220590.1 |
| <i>Tyto alba</i>                | Tal_R006759 | scaffold7106  | Tal_R004924 | Tal_R013125 | XM_009971991.1 |

| Species                         | OCA2          | ASIP          | TYR         | TYRP1         | MC1R          |
|---------------------------------|---------------|---------------|-------------|---------------|---------------|
| <i>Acanthisitta chloris</i>     | Ach_R001753   | scaffold19384 | Ach_R008651 | Ach_R010336   | Ach_R010237   |
| <i>Anas platyrhynchos</i>       | Apl_R001901   | Apl_R010739   | Apl_R007032 | scaffold363   | Apl_R012273   |
| <i>Apaloderma vittatum</i>      | scaffold6063  | Avi_R002363   | Avi_R003613 | Avi_R007091   | C11067011     |
| <i>Aptenodytes forsteri</i>     | Afo_R005363   | Afo_R008324   | Afo_R009840 | Afo_R010783   | Afo_R007528   |
| <i>Balearica regulorum</i>      | Bre_R013695   | Bre_R004216   | Bre_R006844 | scaffold3007  | scaffold34776 |
| <i>Buceros rhinoceros</i>       | Brh_R013403   | scaffold37575 | Brh_R000792 | Brh_R003616   | scaffold36017 |
| <i>Calypte anna</i>             | Aan_R003232   | Aan_R010843   | Aan_R001745 | Aan_R015578   | scaffold330   |
| <i>Caprimugus carolinensis</i>  | Cca_R003164   | Cca_R012605   | Cca_R006373 | Cca_R012949   | scaffold32048 |
| <i>Cariama cristata</i>         | Ccr_R011914   | Ccr_R011875   | Ccr_R001243 | Ccr_R012153   | C10354424     |
| <i>Cathartes aura</i>           | Cau_R013460   | Cau_R010314   | Cau_R007049 | Cau_R011421   | Cau_R006551   |
| <i>Chaetura pelagica</i>        | Cpe_R006175   | scaffold1032  | Cpe_R007882 | Cpe_R008143   | Cpe_R005496   |
| <i>Charadrius vociferus</i>     | Cvo_R006810   | Cvo_R010076   | Cvo_R000148 | Cvo_R004648   | Cvo_R008983   |
| <i>Chlamydotis macqueenii</i>   | Cun_R001729   | Cun_R004370   | Cun_R005445 | Cun_R013118   | scaffold43988 |
| <i>Colius striatus</i>          | scaffold12027 | Cst_R006539   | Cst_R002549 | Cst_R003325   | scaffold51532 |
| <i>Columba livia</i>            | Cli_R007350   | Cli_R016011   | Cli_R012403 | Cli_R012418   | Cli_R001740   |
| <i>Corvus brachyrhynchos</i>    | Cbr_R015986   | Cbr_R010651   | Cbr_R010862 | Cbr_R004835   | Cbr_R009703   |
| <i>Cuculus canorus</i>          | Cca_R007812   | Cca_R001462   | Cca_R002034 | Cca_R009722   | Cca_R010640   |
| <i>Egretta garzetta</i>         | Ega_R015319   | Ega_R005289   | Ega_R001847 | scaffold175   | scaffold428   |
| <i>Eurypyga helias</i>          | Ehe_R013742   | Ehe_R000869   | Ehe_R011924 | Ehe_R001948   | C14857594     |
| <i>Falco peregrinus</i>         | Fpe_R016211   | Fpe_R015508   | Fpe_R012499 | Fpe_R003044   | Fpe_R009326   |
| <i>Fulmarus glacialis</i>       | scaffold14041 | Fgl_R002741   | Fgl_R011593 | Fgl_R000634   | scaffold31831 |
| <i>Gavia stellata</i>           | Gst_R001151   | Gst_R012923   | Gst_R002927 | Gst_R001758   | C12114711     |
| <i>Geospiza fortis</i>          | Gfo_R009685   | Gfo_R011672   | Gfo_R003679 | Gfo_R001937   | Gfo_R000540   |
| <i>Haliaeetus albicilla</i>     | scaffold19972 | Hal_R000525   | Hal_R006345 | Hal_R008176   | *             |
| <i>Haliaeetus leucocephalus</i> | Hle_R015907   | Hle_R011017   | Hle_R016207 | Hle_R016466   | Hle_R009468   |
| <i>Leptosomus discolor</i>      | Ldi_R002849   | scaffold8251  | Ldi_R008956 | Ldi_R011186   | C11262141     |
| <i>Manacus vitellinus</i>       | Mvi_R008334   | Mvi_R005301   | Mvi_R012210 | Mvi_R002298   | Mvi_R004812   |
| <i>Meleagris gallopavo</i>      | Mga_R001749   | Mga_R007970   | Mga_R002335 | Z             | Mga_R004146   |
| <i>Melopsittacus undulatus</i>  | Mun_R011728   | Mun_R007921   | Mun_R010012 | Mun_R015408   | Mun_R000562   |
| <i>Merops nubicus</i>           | Mnu_R005282   | scaffold19071 | Mnu_R002069 | Mnu_R001084   | Mnu_R000150   |
| <i>Mesitornis unicolor</i>      | Mun_R010375   | Mun_R005658   | Mun_R015332 | Mun_R006435   | Mun_R008222   |
| <i>Nestor notabilis</i>         | scaffold8246  | Nno_R002042   | Nno_R000837 | Nno_R003435   | Nno_R002444   |
| <i>Nipponia nippon</i>          | Nni_R002782   | *             | Nni_R013463 | Nni_R004747   | Nni_R011019   |
| <i>Opisthocomus hoazin</i>      | Oho_R014279   | Oho_R012825   | Oho_R000102 | Oho_R009777   | scaffold2471  |
| <i>Pelecanus crispus</i>        | scaffold15426 | Pcr_R013745   | Pcr_R001051 | scaffold3980  | scaffold25530 |
| <i>Phaethon lepturus</i>        | Ple_R001146   | Ple_R002840   | Ple_R000620 | Ple_R012694   | C12929869     |
| <i>Phalacrocorax carbo</i>      | scaffold8622  | Pca_R003876   | Pca_R006344 | Pca_R012291   | scaffold44024 |
| <i>Phoenicopterus ruber</i>     | scaffold5937  | Pru_R010194   | Pru_R013834 | Pru_R000806   | scaffold20554 |
| <i>Picoides pubescens</i>       | Ppu_R015571   | Ppu_R002601   | Ppu_R009434 | Ppu_R002577   | Ppu_R003649   |
| <i>Podiceps cristatus</i>       | Pcr_R007255   | scaffold676   | Pcr_R009349 | Pcr_R005586   | C16189223     |
| <i>Pterocles gutturalis</i>     | Pgu_R012705   | Pgu_R008305   | Pgu_R004255 | Pgu_R012109   | scaffold5252  |
| <i>Pygoscelis adeliae</i>       | Pad_R002840   | Pad_R013742   | Pad_R002612 | Pad_R010951   | C9919992      |
| <i>Struthio camelus</i>         | Sca_R007482   | Sca_R012191   | Sca_R004770 | scaffold13    | scaffold1461  |
| <i>Tauraco erythrolophus</i>    | Ter_R000600   | Ter_R012741   | Ter_R005801 | Ter_R004022   | Ter_R008331   |
| <i>Tinamus guttatus</i>         | Tma_R002862   | Tma_R003505   | Tma_R010061 | Tma_R003004   | scaffold1475  |
| <i>Tyto alba</i>                | scaffold16050 | Tal_R010508   | Tal_R012303 | scaffold13067 | *             |
