# Supplementary material for: Gene loss, adaptive evolution and the co-evolution of plumage coloration genes with opsins in birds
Source: PubMed Central journal article supplement (PMC4595237; doi:10.1186/s12864-015-1924-3), 2015-10-06
Supplement: 12864_2015_1924_MOESM12_ESM.pdf [file 12864_2015_1924_MOESM12_ESM.pdf]

| <b>Gene</b>    | <b>Species</b>                   | <b>Accession number</b> |
|----------------|----------------------------------|-------------------------|
| <i>OPN1lw</i>  | <i>Gallus gallus</i>             | NM_205440.1             |
| <i>OPN1lw</i>  | <i>Platycercus elegans</i>       | KF134493.1              |
| <i>OPN1lw</i>  | <i>Taeniopygia guttata</i>       | NM_001076702.1          |
| <i>OPN1lw</i>  | <i>Ptilonorhynchus violaceus</i> | JQ034370.1              |
| <i>OPN1lw</i>  | <i>Ailuroedus crassirostris</i>  | JQ034368.1              |
| <i>OPN1lw</i>  | <i>Scenopoeetes dentirostris</i> | JQ034369.1              |
| <i>OPN1lw</i>  | <i>Chlamydera maculata</i>       | JQ034372.1              |
| <i>OPN1lw</i>  | <i>Serinus canaria</i>           | AJ277925.1              |
| <i>OPN1lw</i>  | <i>Columba livia</i>             | XM_005514006.1          |
| <i>OPN1lw</i>  | <i>Pseudopodoces humilis</i>     | XM_005534472.1          |
| <i>OPN1lw</i>  | <i>Prionodura newtoniana</i>     | JQ218138.1              |
| <i>OPN1lw</i>  | <i>Scenopoeetes dentirostris</i> | JQ034369.1              |
| <i>OPN1lw</i>  | <i>Falco cherrug</i>             | XM_005436734.1          |
| <i>OPN1lw</i>  | <i>Calypte anna</i>              | XM_008500645.1          |
| <i>OPN1lw</i>  | <i>Chlamydera nuchalis</i>       | JQ034373.1              |
| <i>OPN1lw</i>  | <i>Chlamydera cerviniventris</i> | JQ218135.1              |
| <i>OPN1lw</i>  | <i>Sericulus chrysocephalus</i>  | JQ034371.1              |
| <i>OPN1sw2</i> | <i>Columba livia</i>             | NM_001310048.1          |
| <i>OPN1sw2</i> | <i>Gallus gallus</i>             | NM_205517.1             |
| <i>OPN1sw2</i> | <i>Pseudopodoces humilis</i>     | XM_005534405.1          |
| <i>OPN1sw2</i> | <i>Taeniopygia guttata</i>       | NM_001076697.1          |
| <i>OPN1sw2</i> | <i>Ptilonorhynchus violaceus</i> | JQ034388.1              |
| <i>OPN1sw2</i> | <i>Chlamydera maculata</i>       | JQ034390.1              |
| <i>OPN1sw2</i> | <i>Ailuroedus crassirostris</i>  | JQ034386.1              |
| <i>OPN1sw2</i> | <i>Serinus canaria</i>           | AJ277923.1              |
| <i>OPN1sw2</i> | <i>Platycercus elegans</i>       | KF134491.1              |
| <i>OPN1sw2</i> | <i>Sericulus chrysocephalus</i>  | JQ034389.1              |
| <i>OPN1sw2</i> | <i>Picoides pubescens</i>        | XM_009898807.1          |
| <i>OPN1sw2</i> | <i>Chlamydera nuchalis</i>       | JQ034391.1              |
| <i>OPN1sw2</i> | <i>Scenopoeetes dentirostris</i> | JQ034387.1              |
