# Supplementary material for: Gene loss, adaptive evolution and the co-evolution of plumage coloration genes with opsins in birds
Source: PubMed Central journal article supplement (PMC4595237; doi:10.1186/s12864-015-1924-3), 2015-10-06
Supplement: 12864_2015_1924_MOESM13_ESM.pdf [file 12864_2015_1924_MOESM13_ESM.pdf]

| Species                           | RHI            | OPNIswI        | OPNIlw         | OPN3           | OPN5           | RGR            | RRH            | OPN4m          |
|-----------------------------------|----------------|----------------|----------------|----------------|----------------|----------------|----------------|----------------|
| <i>Ornithorhynchus_anatinus</i>   | NM_001127627.1 |                | EF050078.1     |                | XM_007667004.1 | XM_007657671.1 | XM_001506366.2 | XM_007660572.1 |
| <i>Tachyglossus_aculeatus</i>     | JX103830.1     |                | EU636011.1     |                |                |                |                |                |
| <i>Zaglossus_bruijii</i>          |                |                | DQ111869.1     |                |                |                |                |                |
| <i>Myrmecobius_fasciatus</i>      |                | AY726546.2     | DQ111870.1     |                |                |                |                |                |
| <i>Sarcophilus_harrisii</i>       | XM_003762449.1 | XM_003771592.2 | XM_003774721.2 | XM_003767787.1 | XM_003769136.1 |                | XM_003774474.2 | XM_003754913.1 |
| <i>Sminthopsis_crassicaudata</i>  | AY159786.2     | AY442173.1     | AY430816.1     |                |                |                |                | DQ383281.1     |
| <i>Monodelphis_domestica</i>      | XM_001366188.2 | XM_007504107.1 | NM_001145081.1 | XM_001377887.2 | XM_007484056.1 |                | XM_007495995.1 | XM_007478037.1 |
| <i>Caluromys_philander</i>        | AY313946.1     |                |                |                |                |                |                |                |
| <i>Didelphis_aurita</i>           |                | DQ352182.1     | DQ352180.1     |                |                |                |                |                |
| <i>Thylamys_elegans</i>           |                | DQ356245.1     | DQ356244.1     |                |                |                |                |                |
| <i>Cercartetus_concinnus</i>      |                | AY772473.1     | AY772471.1     |                |                |                |                |                |
| <i>Macropus_eugenii</i>           |                | AY286017.1     | AY286018.1     |                |                |                |                |                |
| <i>Setonix_brachyurus</i>         |                | AY726545.1     | AY745192.1     |                |                |                |                |                |
| <i>Tarsipes_rostratus</i>         |                | AY772472.1     | AY772470.1     |                |                |                |                |                |
| <i>Isodon_obesulus</i>            |                | AY726544.2     | AY745193.1     |                |                |                |                |                |
| <i>Dasyurus_novemcinctus</i>      | XM_004477246.1 |                |                | XM_012522085.1 | XM_004452792.1 | XM_004484497.2 | XM_012518661.1 | XM_004483219.1 |
| <i>Choloepus_didactylus</i>       | AB455169.1     |                |                |                |                |                |                |                |
| <i>Myrmecophaga_tridactyla</i>    | AB455189.1     |                |                |                |                |                |                |                |
| <i>Tamandua_tetradactyla</i>      | AB455203.1     |                |                |                |                |                |                |                |
| <i>Amblysomus_hottentotus</i>     | GQ290298.1     |                |                |                |                |                |                |                |
| <i>Chrysochloris_asiatica</i>     | XM_006868670.1 | XM_006861111.1 |                |                | XM_006860534.1 |                | XM_006869316.1 | XM_006875926.1 |
| <i>Echinops_telfairi</i>          | XM_004702378.1 | XM_004707803.1 | XM_004717562.1 |                | XM_004696371.1 | XM_004713040.1 | XM_004703460.1 | XM_013006313.1 |
| <i>Procavia_capensis</i>          | AB455196.1     |                |                |                |                |                |                |                |
| <i>Elephantulus_edwardii</i>      | XM_006901040.1 | XM_006896064.1 | XM_006899926.1 |                | XM_006881924.1 | XM_006901024.1 | XM_006881091.1 | XM_006894487.1 |
| <i>Macroscelides_proboscideus</i> | GQ290310.1     |                |                |                |                |                |                |                |
| <i>Elephas_maximus</i>            | AB455174.1     |                |                |                |                |                |                |                |
| <i>Loxodonta_africana</i>         | NM_001280858.1 | NM_001280859.1 | NM_001280862.1 | XM_003410915.2 | XM_003404446.2 | XM_003418559.1 | XM_003410397.1 | XM_003418564.1 |
| <i>Dugong_dugon</i>               | AB455173.1     |                |                |                |                |                |                |                |
| <i>Trichechus_manatus</i>         | AF055319.1     |                | XM_004390580.1 | XM_004375853.1 | XM_004379536.1 | XM_004389893.1 | XM_004380256.2 | XM_004386107.2 |
| <i>Orycteropus_afer_afer</i>      | XM_007956743.1 | XM_007955413.1 | XM_007957152.1 | XM_007942718.1 | XM_007936162.1 | XM_007954235.1 | XM_007940751.1 | XM_007955933.1 |
| <i>Ailuropoda_melanoleuca</i>     | XM_002921249.2 | XM_002913423.2 | XM_002928811.2 | XM_011223981.1 | XM_002919006.1 | XM_002915389.2 | XM_002929340.1 | XM_011219945.1 |
| <i>Artibeus_jamaicensis</i>       | GQ290299.1     |                |                |                |                |                |                |                |
| <i>Balaenoptera_acutorostrata</i> | XM_007192608.1 | XM_007177192.1 | XM_007185533.1 | XM_007182615.1 | XM_007193850.1 | XM_007174576.1 | XM_007191029.1 | XM_007174566.1 |
| <i>Bison_bison</i>                | XM_010862448.1 | XM_010831706.1 | XM_010840278.1 |                | XM_010863044.1 | XM_010854377.1 | XM_010858539.1 | XM_010854385.1 |
| <i>Bos_mutus</i>                  | XM_005902834.1 | XM_005905247.1 | XM_005909080.1 |                | XM_005904414.1 | XM_005902591.1 | XM_005896227.1 | XM_005909983.1 |
| <i>Bos_taurus</i>                 | NM_001014890.1 | NM_174567.1    | NM_174566.1    |                | XM_010818222.1 | NM_175775.2    | NM_001192224.1 | NM_001192399.1 |
| <i>Bubalus_bubalis</i>            | XM_006078900.1 | XM_006074392.1 | XM_006043645.1 |                | XM_006076114.1 | XM_006072363.1 | XM_006052204.1 | XM_006066606.1 |
| <i>Camelus_bactrianus</i>         | XM_010953086.1 | XM_010947561.1 | XM_010964076.1 | XM_010974055.1 |                | XM_010963086.1 | XM_010953677.1 | XM_010953736.1 |
| <i>Camelus_dromedarius</i>        | XM_010984900.1 | XM_010975637.1 | XM_010991460.1 | XM_010992162.1 | XM_010995432.1 | XM_010984078.1 |                | XM_010997691.1 |
| <i>Camelus_ferus</i>              | XM_006180073.1 | XM_006184725.1 | XM_006188804.1 | XM_006195663.1 | XM_006190729.1 | XM_006173999.1 | XM_006188932.1 | XM_006194367.1 |
| <i>Canis_lupus</i>                | XM_005632035.1 | XM_539386.3    | NM_001197072.1 | XM_005622576.1 | XM_003639428.2 | XM_546190.4    | XM_005639270.1 | XM_005619440.1 |
| <i>Capra_hircus</i>               |                | XM_005679445.1 | XM_005701738.1 |                | XM_005696391.1 | XM_005699305.1 | XM_005681311.1 | XM_005699313.1 |
| <i>Ceratotherium_simum</i>        | XM_004442424.1 | XM_004418710.1 | XM_004443325.1 | XM_004439605.1 | XM_004424042.1 | XM_004432483.1 | XM_004426582.1 | XM_004432477.1 |
| <i>Chaerephon_plicatus</i>        | XM_004692360.2 | XM_004677016.2 | XM_012734472.1 |                |                |                | XM_004686475.1 |                |
| <i>Cynopterus_sphinx</i>          | GQ863420.1     | GQ863415.1     | GQ863439.1     |                |                |                |                |                |
| <i>Delphinus_delphis</i>          | AF055314.1     |                | AY228451.1     |                |                |                |                |                |
| <i>Enhydra_lutris</i>             | AY883931.1     |                | AY884350.1     |                |                |                |                |                |
| <i>Eptesicus_fuscus</i>           | XM_008152292.1 | XM_008154038.1 | XM_008159259.1 |                | XM_008153205.1 | XM_008149130.1 | XM_008150280.1 | XM_008149131.1 |
| <i>Equus_caballus</i>             | XM_001490301.3 | XM_001502735.4 | AF031531.1     | XM_005607945.1 | XM_001502775.2 | XM_001495788.2 | XM_001503520.3 | XM_005602742.1 |
| <i>Erignathus_barbatus</i>        | AY883932.1     |                | AY884351.1     |                |                |                |                |                |
| <i>Erinaceus_europaeus</i>        | XM_007517079.1 | XM_007526304.1 | XM_007534857.1 |                | XM_007517838.1 | XM_007533920.1 | XM_007534492.1 | XM_007530217.1 |
| <i>Eubalaena_glacialis</i>        | JQ730751.1     |                |                |                |                |                |                |                |
| <i>Felis_catus</i>                | NM_001009242.1 | XM_003983019.3 | AF031532.1     | XM_003999138.3 | XM_003986222.2 | XM_003994126.2 | XM_003985084.1 | XM_006937944.1 |
| <i>Globicephala_melas</i>         | AF055315.1     |                | AY228446.1     |                |                |                |                |                |
| <i>Haplonycteris_fischeri</i>     |                | AM263196.1     | AM263193.1     |                |                |                |                |                |
| <i>Hipposideros_armiger</i>       | GQ863417.1     |                | GQ863448.1     |                |                |                |                |                |
| <i>Hipposideros_larvatus</i>      | GQ290308.1     |                | GQ863445.1     |                |                |                |                |                |
| <i>Hipposideros_pomona</i>        | GQ863426.1     |                | GQ863454.1     |                |                |                |                |                |
| <i>Hipposideros_pratti</i>        | GQ290309.1     |                |                |                |                |                |                |                |
| <i>Hydrurga_leptonyx</i>          | AY883930.1     |                |                |                |                |                |                |                |
| <i>Leptonychotes_weddellii</i>    | XM_006740235.1 | XM_006745503.1 | XM_006739353.1 | XM_006746683.1 | XM_006727572.1 | XM_006742966.1 | XM_006727200.1 | XM_006740386.1 |
| <i>Megaderma_spasma</i>           | GQ290316.1     |                |                |                |                |                |                |                |
| <i>Mesoplodon_bidens</i>          | AF055316.1     |                |                |                |                |                |                |                |
| <i>Miniopterus_fuliginosus</i>    | GQ863431.1     | GQ863406.1     | GQ863447.1     |                |                |                |                |                |
| <i>Mirounga_angustirostris</i>    | AY228452.1     |                | AY884347.1     |                |                |                |                |                |
| <i>Mustela_putorius</i>           | XM_004738577.1 | XM_004789507.1 | XM_004780711.1 | XM_004756757.1 | XM_004739727.1 | XM_004765768.1 | XM_004748079.1 | XM_004765783.1 |
| <i>Myotis_brandtii</i>            | XM_005870029.1 | XM_005868920.1 | XM_005886120.1 |                | XM_005862327.1 | XM_005871152.1 | XM_005872403.1 | XM_005871127.1 |
| <i>Myotis_davidii</i>             | XM_006758300.1 | XM_006771393.1 | GQ863453.1     |                | XM_006765717.1 | XM_006755598.1 | XM_006755231.1 | XM_006767920.1 |
| <i>Myotis_laniger</i>             | GQ863435.1     | GQ863407.1     | GQ863442.1     |                |                |                |                |                |
| <i>Myotis_lucifugus</i>           | XM_006083811.1 | GQ225742.1     | GQ225743.1     |                | XM_006093215.1 | XM_006100132.1 | XM_006101369.1 | XM_006100103.1 |
| <i>Myotis_ricketti</i>            | GQ290312.1     | EU662250.1     | GQ863444.1     |                |                |                |                |                |
| <i>Myotis_velifer</i>             |                | AM263197.1     | AM263194.1     |                |                |                |                |                |

| Species                          | RHI            | OPN1sw1        | OPN1lw         | OPN3           | OPN5           | RGR            | RRH            | OPN4m          |
|----------------------------------|----------------|----------------|----------------|----------------|----------------|----------------|----------------|----------------|
| <i>Nyctalus_plancyi</i>          | GQ863422.1     | GQ863408.1     | GQ863459.1     |                |                |                |                |                |
| <i>Odobenus_rosmarus</i>         | XM_004395657.1 | XM_004398023.2 | AY884344.1     | XM_004414269.1 | XM_004408452.1 | XM_004416238.1 | XM_004411253.2 | XM_004410203.1 |
| <i>Odocoileus_virginianus</i>    |                |                | AF132041.1     |                |                |                |                |                |
| <i>Orcinus_orca</i>              | XM_004284305.2 | XM_004272260.1 | XM_004286442.2 | XM_004283495.1 | XM_004267503.1 | XM_004273014.1 | XM_004269577.1 | XM_004273009.1 |
| <i>Ovis_aries</i>                | XM_004018534.2 | XM_012131493.1 | XM_004022260.2 |                | XM_012114096.1 | XM_004021531.2 | XM_004009620.2 | XM_012152559.1 |
| <i>Panthera_tigris</i>           | XM_007075434.1 | XM_007078061.1 |                | XM_007077038.1 | XM_007085094.1 | XM_007093130.1 | XM_007098257.1 | XM_007093138.1 |
| <i>Pantholops_hodgsonii</i>      | XM_005955745.1 | XM_005981411.1 | XM_005957735.1 |                | XM_005960627.1 | XM_005972724.1 | XM_005970518.1 | XM_005964475.1 |
| <i>Phoca_groenlandica</i>        | AF055318.1     |                | AY228449.1     |                |                |                |                |                |
| <i>Phoca_hispida</i>             | AY883927.1     |                | AY884346.1     |                |                |                |                |                |
| <i>Phoca_vitulina</i>            | AF055317.1     |                | AF110495.1     |                |                |                |                |                |
| <i>Phocoena_phocoena</i>         |                |                | AY228450.1     |                |                |                |                |                |
| <i>Physeter_catodon</i>          | XM_007126220.1 | XM_007119765.1 | XM_007113595.1 | XM_007130878.1 | XM_007127388.1 | XM_007104038.1 | XM_007105856.1 | XM_007120485.1 |
| <i>Pteropus_alecto</i>           | XM_006917646.1 | XM_006910537.1 | XM_006915297.1 | XM_006924119.1 | XM_006926469.1 | XM_006915458.1 | XM_006919063.1 | XM_006915451.1 |
| <i>Pteropus_dasymallus</i>       |                | AM263192.1     | AM263195.1     |                |                |                |                |                |
| <i>Pteropus_vampyrus</i>         | XM_011370659.1 | XM_011357263.1 | XM_011375552.1 | XM_011380004.1 | XM_011354795.1 | XM_011355342.1 | XM_011361528.1 | XM_011355352.1 |
| <i>Rangifer_tarandus</i>         |                | FN808318.1     |                |                |                |                |                |                |
| <i>Rhinolophus_ferrumequinum</i> | GQ290314.1     |                |                |                |                |                |                |                |
| <i>Rhinolophus_pearsonii</i>     | GQ863432.1     |                | GQ863457.1     |                |                |                |                |                |
| <i>Rhinolophus_pusillus</i>      | GQ290315.1     |                | GQ863452.1     |                |                |                |                |                |
| <i>Rhinolophus_sinicus</i>       | GQ863434.1     | GQ863413.1     | GQ863446.1     |                |                |                |                |                |
| <i>Rousettus_leschenaultii</i>   | GQ290317.1     |                | GQ863440.1     |                |                |                |                |                |
| <i>Sorex_araneus</i>             | XM_004613232.1 | XM_004608279.2 | XM_004606597.1 |                | XM_012932158.1 | XM_004607557.1 | XM_004612758.1 | XM_012932474.1 |
| <i>Sus_scrofa</i>                | NM_214221.1    | NM_214090.1    | NM_001011506.1 |                | XM_005674065.1 | XM_005671156.1 | XM_003129266.1 | XM_001925749.2 |
| <i>Taphozous_melanopogon</i>     | GQ290318.1     | GQ863411.1     | GQ863443.1     |                |                |                |                |                |
| <i>Tursiops_truncatus</i>        | NM_001280659.1 |                | AF055457.1     |                | XM_004314422.1 | XM_004320073.1 | XM_004330526.1 | XM_004324747.1 |
| <i>Ursus_maritimus</i>           | XM_008697847.1 | XM_008705848.1 | AY884345.1     | XM_008697245.1 | XM_008691820.1 | XM_008696318.1 | XM_008689511.1 | XM_008696127.1 |
| <i>Vicugna_pacos</i>             | XM_006206787.1 | XM_006202271.1 | XM_006218499.1 | XM_006220133.1 | XM_006201926.1 | XM_006213095.1 | XM_006212047.1 | XM_006217382.1 |
| <i>Zalophus_californianus</i>    | AY883924.1     |                | AY884343.1     |                |                |                |                |                |
| <i>Alouatta_palliata</i>         |                |                | AB809459.1     |                |                |                |                |                |
| <i>Alouatta_pigra</i>            |                |                | AB809461.1     |                |                |                |                |                |
| <i>Alouatta_seniculus</i>        |                |                | AH007056.2     |                |                |                |                |                |
| <i>Arvicanthis_ansorgei</i>      | EU862075.1     |                |                |                |                |                |                | KC150901.1     |
| <i>Ateles_geoffroyi</i>          |                |                | AB193790.1     |                |                |                |                |                |
| <i>Callithrix_jacchus</i>        | XM_008982215.1 | XM_002752031.2 | AB046546.1     | XM_003735287.2 | XM_002746623.2 | XM_009009624.1 | XM_002745490.3 | XM_009009611.1 |
| <i>Cavia_porcellus</i>           | NM_001173085.1 | NM_001172758.1 | AF031529.1     | XM_003474311.2 | XM_003473618.1 | XM_003466148.1 | XM_003467998.1 | XM_003466144.1 |
| <i>Cebus_capucinus</i>           |                |                | AB193772.1     |                |                |                |                |                |
| <i>Cebus_olivaceus</i>           |                |                | AH006290.2     |                |                |                |                |                |
| <i>Cercocebus_atys</i>           | XM_012060295.1 | XM_012087993.1 | XM_012088314.1 | XM_012036274.1 | XM_012070473.1 | XM_012077132.1 | XM_012029027.1 | XM_012077116.1 |
| <i>Chinchilla_lanigera</i>       | XM_005387085.1 | XM_005402383.1 | XM_005414184.1 | XM_005374819.1 | XM_005389879.1 | XM_005407883.1 | XM_005406281.1 |                |
| <i>Chlorocebus_sabaeus</i>       | XM_007985378.1 | XM_007982851.1 | XM_007993132.1 | XM_007989937.1 | XM_007972311.1 |                | XM_007999533.1 | XM_007962704.1 |
| <i>Colobus_angolensis</i>        | XM_011950692.1 | XM_011939561.1 |                | XM_011955692.1 | XM_011960271.1 | XM_011950422.1 | XM_011945758.1 | XM_011950413.1 |
| <i>Cricetulus_griseus</i>        | NM_001244407.1 | XM_003497518.2 | XM_003506533.2 | XM_007639594.1 | XM_007626739.1 | XM_003504562.1 | XM_003515437.2 | XM_003495335.2 |
| <i>Fukomys_damarensis</i>        | XM_010637946.1 | XM_010633453.1 | XM_010628046.1 | XM_010642658.1 | XM_010617783.1 | XM_010622597.1 | XM_010641519.1 | XM_010622583.1 |
| <i>Galeopterus_variegatus</i>    | XM_008574046.1 | XM_008585390.1 | XM_008578409.1 | XM_008575257.1 | XM_008586585.1 | XM_008586092.1 | XM_008570183.1 | XM_008570316.1 |
| <i>Gorilla_gorilla</i>           | XM_004036292.1 | AH005811.2     | XM_004065128.1 | XM_004028670.1 | XM_004044155.1 | XM_004049701.1 | XM_004040277.1 | XM_004049711.1 |
| <i>Heterocephalus_glaber</i>     | XM_004902702.1 | XM_004856389.1 |                | XM_004921366.1 | XM_004846396.1 | XM_004891582.1 | XM_004878833.1 | XM_004878214.1 |
| <i>Homo_sapiens</i>              | KJ849294.1     | NM_001708.2    | CR749814.1     | AF482426.1     | XM_011514347.1 |                | BC128401.1     | AB065730.1     |
| <i>Jaculus_jaculus</i>           | XM_004651581.1 | XM_004661221.2 | XM_004672101.2 | XM_004653438.1 | XM_004649433.2 | XM_004658006.1 | XM_004658625.1 | XM_004657836.1 |
| <i>Lagothrix_lagotricha</i>      |                |                | AB467314.1     |                |                |                |                |                |
| <i>Macaca_fascicularis</i>       | NM_001283360.1 | NM_001283204.1 | AF158968.1     | XM_005539667.1 | XM_005552779.1 | XM_005565268.1 | XM_005555667.1 | XM_005565254.1 |
| <i>Macaca_mulatta</i>            | XM_001094250.1 | XM_001091869.2 |                | XM_001094239.2 | XM_001104044.2 | XM_001086190.2 | XM_002808418.1 | XM_001088248.2 |
| <i>Macaca_nemestrina</i>         | XM_011734526.1 | XM_011729315.1 | XM_011716774.1 | XM_011729473.1 | XM_011756883.1 | XM_011766017.1 | XM_011749030.1 | XM_011765995.1 |
| <i>Mandrillus_leucophaeus</i>    | XM_011974200.1 | XM_011995905.1 | XM_012002287.1 | XM_011990032.1 | XM_011986880.1 | XM_011985817.1 | XM_011970568.1 | XM_011995396.1 |
| <i>Mesocricetus_auratus</i>      | XM_005066100.1 |                | XM_005086920.1 | XM_005078169.1 | XM_005072296.1 | XM_005077615.1 | XM_005082830.1 | XM_005077694.1 |
| <i>Microcebus_murinus</i>        |                |                |                |                |                | XM_012764714.1 |                |                |
| <i>Microtus_ochrogaster</i>      | XM_005365058.1 | XM_005365745.1 | XM_005370706.1 | XM_005368525.1 | XM_005359789.1 | XM_005348668.1 | XM_005357272.1 | XM_005348669.1 |
| <i>Miopithecus_talapoin</i>      |                |                |                |                |                |                |                |                |
| <i>Mus_musculus</i>              | AK044412.1     |                | NM_008106.2    | AF482427.1     | XM_006524455.2 |                | AK021379.1     | BC139827.1     |
| <i>Nannospalax_ehrenbergi</i>    | AF309568.1     |                | AF139726.1     |                |                |                |                | AM748539.1     |
| <i>Nannospalax_galili</i>        | XM_008854920.1 | XM_008846382.1 | XM_008829579.1 | XM_008849180.1 | XM_008846735.1 | XM_008835592.1 | XM_008843722.1 | XM_008824437.1 |
| <i>Nomascus_leucogenys</i>       | XM_003265030.3 | XM_003261297.2 | XM_003279299.1 | XM_012506427.1 | XM_003254193.1 | XM_012502904.1 | XM_003269355.3 | XM_003278589.1 |
| <i>Ochotona_princeps</i>         | XM_004581320.1 | XM_004592516.1 | XM_004598859.1 | XM_004578507.2 | XM_004590534.1 | XM_004583348.1 | XM_004594526.1 | XM_012926407.1 |
| <i>Octodon_degus</i>             | XM_004645617.2 | XM_004642726.1 | XM_004645096.2 | XM_004626818.1 | XM_004624089.2 | XM_004641249.1 | XM_004626684.1 | XM_012516915.1 |
| <i>Oryctolagus_cuniculus</i>     | XM_008260202.1 | XM_008258230.1 | AF031526.1     | XM_008268230.1 | XM_008263024.1 | XM_002720984.2 | XM_002717186.1 | XM_008269901.1 |
| <i>Otolemur_crassicaudatus</i>   | AB112591.1     |                | AB112590.1     |                |                |                |                |                |
| <i>Otolemur_garnettii</i>        | XM_003796229.2 | XM_006504966.2 | XM_003802556.1 | XM_003800078.2 | XM_003789251.2 | XM_003783729.2 | XM_003798152.2 | XM_008953547.1 |
| <i>Pan_paniscus</i>              | XM_003829435.2 | AH005812.2     |                | XM_003824550.2 | XM_003833187.1 | XM_008953557.1 | XM_003830020.2 | XM_009458846.1 |
| <i>Pan_troglodytes</i>           | XM_516740.5    | NM_001009127.1 | XM_003317779.1 | XM_514302.5    | XM_009451417.1 | XM_009458833.1 | XM_001138878.3 | XM_003903672.2 |
| <i>Papio_anubis</i>              | XM_003906878.2 | XM_003896561.2 | NM_001168797.1 | XM_009196635.1 | XM_009205336.1 | XM_009214476.1 | XM_003899089.2 | XM_006976740.1 |
| <i>Peromyscus_maniculatus</i>    | XM_006978532.1 | XM_006979426.1 | XM_006992450.1 | XM_006996184.1 | XM_006994448.1 | XM_006976683.1 | XM_006970386.1 | AY726733.1     |
| <i>Phodopus_sungorus</i>         |                | AY029604.1     |                |                |                |                |                |                |
| <i>Pongo_abelii</i>              | XM_002813145.3 | XM_002818421.2 | XM_002832301.1 | XM_002809252.3 | XM_002816969.1 | XM_009245403.1 | XM_002815057.2 | XM_009245400.1 |

| <b>Species</b>                       | <b>RHI</b>     | <b>OPNIswI</b> | <b>OPNIlw</b>  | <b>OPN3</b>    | <b>OPN5</b>    | <b>RGR</b>     | <b>RRH</b>     | <b>OPN4m</b>   |
|--------------------------------------|----------------|----------------|----------------|----------------|----------------|----------------|----------------|----------------|
| <i>Propithecus_coquereli</i>         | XM_012655172.1 | XM_012664772.1 | XM_012662045.1 | XM_012644391.1 | XM_012664670.1 | XM_012648008.1 | XM_012655079.1 | XM_012651274.1 |
| <i>Rattus_norvegicus</i>             | NM_033441.1    | NM_031015.1    | NM_053548.1    | NM_001191933.1 | NM_181772.1    | XM_008771101.1 | NM_001107726.1 | NM_138860.1    |
| <i>Rhinopithecus_roxellana</i>       | XM_010381505.1 | XM_010378740.1 | XM_010373544.1 | XM_010384714.1 | XM_010362833.1 | XM_010376335.1 | XM_010389068.1 | XM_010380490.1 |
| <i>Saguinus_mystax</i>               |                |                | AH006288.2     |                |                |                |                |                |
| <i>Saimiri_boliviensis</i>           | XM_003926159.2 | XM_003921010.2 | XM_003943902.1 | XM_010345874.1 | XM_003923093.2 | XM_010330400.1 | XM_003929459.1 | XM_003929949.2 |
| <i>Saimiri_sciureus</i>              |                |                | AH006282.2     |                |                |                |                |                |
| <i>Sciurus_carolinensis</i>          |                | DQ302163.1     | AF132044.1     |                |                |                |                |                |
| <i>Spermophilus_tridecemlineatus</i> | XM_005333784.1 | XM_005319430.1 | NM_001282263.1 | XM_005326574.1 | XM_005318596.1 | XM_005340085.1 | XM_005330094.1 | XM_005340562.1 |
| <i>Tarsius_syrichta</i>              | XM_008047820.1 | XM_008063590.1 | XM_008071543.1 | XM_008063894.1 | XM_008062681.1 | XM_008067019.1 | XM_008065518.1 | XM_008060099.1 |
| <i>Tupaia_chinensis</i>              | XM_006160664.1 | XM_006146852.1 | XM_006166677.1 | XM_006142367.1 | XM_006149093.1 | XM_006148709.1 | XM_006162245.1 | XM_006165495.1 |
