# Supplementary material for: Gene loss, adaptive evolution and the co-evolution of plumage coloration genes with opsins in birds
Source: PubMed Central journal article supplement (PMC4595237; doi:10.1186/s12864-015-1924-3), 2015-10-06
Supplement: 12864_2015_1924_MOESM14_ESM.pdf [file 12864_2015_1924_MOESM14_ESM.pdf]

**A. Analysis for the avian genes**

|                | <b>Iss</b> | <b>Iss.c</b> | <b>t</b> | <b>df</b> | <b>p-value</b> |
|----------------|------------|--------------|----------|-----------|----------------|
| <i>RH1</i>     | 0.141      | 0.743        | 55.584   | 935       | 0.000          |
| <i>RH2</i>     | 0.118      | 0.752        | 59.840   | 1064      | 0.000          |
| <i>OPN1sw1</i> | 0.118      | 0.752        | 59.464   | 1064      | 0.000          |
| <i>OPN1sw2</i> | 0.242      | 0.766        | 30.103   | 1022      | 0.000          |
| <i>OPN1lw</i>  | 0.302      | 0.762        | 40.769   | 956       | 0.000          |
| <i>OPN4x</i>   | 0.207      | 0.761        | 55.063   | 1205      | 0.000          |
| <i>OPN4m</i>   | 0.131      | 0.748        | 74.345   | 1004      | 0.000          |
| <i>OPN3</i>    | 0.082      | 0.708        | 60.807   | 551       | 0.000          |
| <i>TMT2</i>    | 0.357      | 0.710        | 14.007   | 575       | 0.000          |
| <i>TMT</i>     | 0.132      | 0.725        | 40.512   | 566       | 0.000          |
| <i>PIN</i>     | 0.321      | 0.751        | 34.114   | 1052      | 0.000          |
| <i>VA</i>      | 0.207      | 0.743        | 41.509   | 929       | 0.000          |
| <i>RGR</i>     | 0.205      | 0.739        | 34.344   | 884       | 0.000          |
| <i>RRH</i>     | 0.134      | 0.741        | 65.866   | 911       | 0.000          |
| <i>OPN5</i>    | 0.222      | 0.768        | 40.788   | 1070      | 0.000          |
| <i>MC1R</i>    | 0.136      | 0.738        | 46.713   | 872       | 0.000          |
| <i>TYR</i>     | 0.163      | 0.778        | 71.701   | 1586      | 0.000          |
| <i>TYRP1</i>   | 0.113      | 0.769        | 71.390   | 1370      | 0.000          |
| <i>OCA2</i>    | 0.173      | 0.791        | 90.704   | 2270      | 0.000          |
| <i>ASIP</i>    | 0.241      | 0.693        | 20.089   | 416       | 0.000          |

**B. Analysis for the mammalian opsins**

|                | <b>Iss</b> | <b>Iss.c</b> | <b>t</b> | <b>df</b> | <b>p-value</b> |
|----------------|------------|--------------|----------|-----------|----------------|
| <i>RH1</i>     | 0.284      | 0.751        | 36.203   | 1043      | 0.000          |
| <i>OPN1sw1</i> | 0.307      | 0.751        | 34.954   | 1043      | 0.000          |
| <i>OPN1lw</i>  | 0.340      | 0.754        | 27.853   | 1088      | 0.000          |
| <i>OPN4m</i>   | 0.280      | 0.770        | 38.115   | 1391      | 0.000          |
| <i>OPN3</i>    | 0.392      | 0.761        | 24.914   | 1202      | 0.000          |
| <i>RGR</i>     | 0.236      | 0.738        | 33.464   | 872       | 0.000          |
| <i>RRH</i>     | 0.276      | 0.749        | 40.882   | 1010      | 0.000          |
| <i>OPN5</i>    | 0.189      | 0.752        | 52.204   | 1055      | 0.000          |
